# Quantitative systems pharmacological analysis of drugs of abuse reveals the pleiotropy of their targets and the effector role of mTORC1

1 Fen Pei<sup>†</sup>, Hongchun Li<sup>†</sup>, Bing Liu and Ivet Bahar<sup>\*</sup>

2 Department of Computational and Systems Biology, School of Medicine, University of Pittsburgh,  
3 PA, 15213, USA

4 **\* Correspondence:**

5 Dr. Ivet Bahar  
6 bahar@pitt.edu

7 <sup>†</sup> These authors made equal contributions

8 **Keywords: Drug abuse, quantitative systems pharmacology, pleiotropic proteins, mTOR**  
9 **complex 1, drug-target interactions, neurotransmission, machine learning, cellular pathways,**  
10 **addiction development.**

## 11 Abstract

12 Existing treatments against drug addiction are often ineffective due to the complexity of the networks  
13 of protein-drug and protein-protein interactions (PPIs) that mediate the development of drug  
14 addiction and related neurobiological disorders. There is an urgent need for understanding the  
15 molecular mechanisms that underlie drug addiction toward designing novel preventive or therapeutic  
16 strategies. The rapidly accumulating data on addictive drugs and their targets as well as advances in  
17 machine learning methods and computing technology now present an opportunity to systematically  
18 mine existing data and draw inferences on potential new strategies. To this aim, we carried out a  
19 comprehensive analysis of cellular pathways implicated in a diverse set of 50 drugs of abuse using  
20 quantitative systems pharmacology methods. The analysis of the drug/ligand-target interactions  
21 compiled in DrugBank and STITCH databases revealed 142 known and 48 newly predicted targets,  
22 which have been further analyzed to identify the KEGG pathways enriched at different stages of drug  
23 addiction cycle, as well as those implicated in cell signaling and regulation events associated with  
24 drug abuse. Apart from synaptic neurotransmission pathways detected as a common upstream  
25 signaling module that ‘senses’ the early effects of drugs of abuse, pathways involved in  
26 neuroplasticity are distinguished as determinants of neuronal morphological changes. Notably, many  
27 signaling pathways converge on important targets such as mTORC1. The latter is proposed to act as a  
28 universal effector of the persistent restructuring of neurons in response to continued use of drugs of  
29 abuse.

## 30 1 Introduction

31 Drug addiction is a chronic relapsing disorder characterized by compulsive, excessive, and self-  
32 damaging use of drugs of abuse. It is a debilitating condition that potentially leads to serious  
33 physiological injury, mental disorder and death, resulting in major health and social economic  
34 impacts worldwide (Nestler, 2013; Koob and Volkow, 2016). Substances with diverse chemical  
35 structures and mechanisms of action are known to cause addiction. Except for alcohol and tobacco,  
36 substances of abuse are commonly classified into six groups based on their primary targets or effects:

37 cannabinoids (e.g. cannabis), opioids (e.g. morphine, heroin, fentanyl), central nervous system (CNS)  
38 depressants (e.g. pentobarbital, diazepam), CNS stimulants (e.g. cocaine, amphetamine),  
39 hallucinogens (e.g. ketamine, lysergic acid diethylamide) and anabolic steroids (e.g. nandrolone,  
40 oxymetholone).

41 The primary actions of drugs of abuse have been well studied. In spite of the pleiotropy and  
42 heterogeneity of drugs of abuse, they share similar phenotypes: from acute intoxication to chronic  
43 dependence (Taylor et al., 2013), the reinforcement shift from positive to negative through a three-  
44 stage cycle involving binge/intoxication, withdrawal/negative effect, and preoccupation/anticipation  
45 (Koob and Volkow, 2016). Notably, virtually all drugs of abuse augment dopaminergic transmission  
46 in the reward system (Wise, 1996). However, the detailed cellular pathways of addiction processes  
47 are still far from known. For example, cocaine acts primarily as an inhibitor of dopamine (DA)  
48 transporter (DAT) and results in DA accumulation in the synapses of DA neurons (Shimada et al.,  
49 1991; Volkow et al., 1997). However, it has been shown that DA accumulation *per se* is not  
50 sufficient to account for the rewarding process associated with cocaine addiction; serotonin (5-HT)  
51 and noradrenaline/norepinephrine (NE) also play important roles (Rocha et al., 1998; Sora et al.,  
52 1998). Another example is ketamine, a nonselective antagonist for N-methyl-d-aspartate (NMDA)  
53 receptor (NMDAR), notably most effective in the amygdala and hippocampal regions of neurons  
54 (Collingridge et al., 1983). In addition to its primary action, ketamine affects a number of other  
55 neurotransmitter receptors, including sigma-1 (Mendelsohn et al., 1985), substance P (Okamoto et  
56 al., 2003), opioid (Hustveit et al., 1995), muscarinic acetylcholine (mACh) (Hirota et al., 2002),  
57 nicotinic acetylcholine (nACh) (Coates and Flood, 2001), serotonin (Kapur and Seeman, 2002), and  
58  $\gamma$ -aminobutyric acid (GABA) receptors (Hevers et al., 2008). The promiscuity of drugs of abuse  
59 brings an additional layer of complexity, which prevents the development of efficient treatment  
60 against drug addiction.

61 In recent years there has been significant progress in the characterization of drug/target/pathway  
62 relations driven by the accumulation of drug-target interactions and pathways data, as well as the  
63 development of machine learning, *in silico* genomics, chemogenomics and quantitative systems  
64 pharmacology (QSP) tools. Several innovative studies started to provide valuable information on  
65 substance abuse targets and pathways. For example, Li et al. curated 396 drug abuse related genes  
66 from the literature and identified five common pathways underlying the reward and addiction actions  
67 of cocaine, alcohol, opioids and nicotine (Li et al., 2008). Hu et al. analyzed the genes related to  
68 nicotine addiction via a pathway and network-based approach (Hu et al., 2018). Biernacka et al.  
69 performed genome-wide analysis on 1165 alcohol-dependence cases and identified two pathways  
70 associated with alcohol dependence (Biernacka et al., 2013). Xie et al. generated chemogenomics  
71 knowledgebases focused on G-protein coupled receptors (GPCRs) related to drugs of abuse in  
72 general (Xie et al., 2014), and cannabinoids in particular (Xie et al., 2016). Notably, these studies  
73 have shed light on selected categories or subgroups of drugs. There is a need to understand the  
74 intricate couplings between multiple pathways implicated in the cellular response to drugs of abuse,  
75 identify mechanisms common to various categories of drugs while distinguishing those unique to  
76 selected categories.

77 We undertake here such a systems-level approach using a dataset composed of six different  
78 categories of drugs of abuse. Following a QSP approach proposed earlier (Stern et al., 2016), we  
79 provide a comprehensive, unbiased glimpse of the complex mechanisms implicated in addiction.  
80 Specifically, a set of 50 drugs of abuse with a diversity in chemical structures and pharmacological  
81 actions were collected as probes, and the known targets of these drugs as well as the targets predicted  
82 using our probabilistic matrix factorization (PMF) method (Cobanoglu et al., 2013) were analyzed to

83 infer biological pathways associated with drug addiction. Our analysis yielded 142 known and 48  
84 predicted targets and 173 pathways permitting us to identify both generic mechanisms regulating the  
85 responses to drug abuse as well as specific mechanisms associated with selected categories, which  
86 could both facilitate the development of auxiliary agents for treatment of addiction.

87 A key step in our approach is to identify the targets for drugs of abuse. There exists various drug-  
88 target interaction databases (DBs), web servers and computational models, as summarized recently  
89 (Chen et al., 2016). The drug-target interaction DBs utilized in this work are DrugBank (Wishart et  
90 al., 2018) and STITCH (Szklarczyk et al., 2016). DrugBank is a bioinformatics and cheminformatics  
91 resource that combines drug data with comprehensive target information. It is frequently updated,  
92 with the current version containing 10,562 drugs, 4,493 targets and corresponding 16,959  
93 interactions. Since most of drugs of abuse are approved or withdrawn drugs, DrugBank is a good  
94 source for obtaining information on their interactions. STITCH, on the other hand, is much more  
95 extensive. It integrates chemical-protein interactions from experiments, other DBs, literature and  
96 predictions, resulting in data on 430,000 chemicals and 9,643,763 proteins across 2,031 genomes.  
97 We have used the subset of human protein-chemicals data supported by experimental evidence. The  
98 method of approach adopted here is an important advance over our original PMF-based machine  
99 learning methodology for predicting drug-target interactions (Cobanoglu et al., 2013). First, the  
100 approach originally developed for mining DrugBank has been extended to analyzing the STITCH  
101 DB, the content of which is 2-3 orders of magnitude larger than DrugBank (based on the respective  
102 numbers of interactions). Second, the information on predicted drug-target associations is  
103 complemented by pathway data on *humans* inferred from the KEGG pathway DB (December 2017  
104 version) (Kanehisa et al., 2017) upon pathway enrichment analysis of known and predicted targets.  
105 Third, the outputs are subjected to extensive analyses to detect recurrent patterns and formulate new  
106 hypotheses for preventive or therapeutic strategies against drug abuse.

## 107 2 Materials and Methods

### 108 2.1 Selection of drugs of abuse and their known targets

109 We selected as input 50 drugs commonly known as drugs of abuse using two basic criteria: (i)  
110 diversity in terms of structure and mode of action, and (ii) availability of information on at least one  
111 human target protein in DrugBank v5 (Wishart et al., 2018) or STITCH v5 (Szklarczyk et al., 2016).  
112 The selected drugs represent six different categories: CNS stimulants, CNS depressants, opioids,  
113 cannabinoids, anabolic steroids and hallucinogens (see **Supplementary Table 1** and **Supplementary**  
114 **Figure 1** for details).

115 A dataset of 142 known targets, listed in **Supplementary Table 2**, were retrieved from DrugBank  
116 and STITCH DBs for these 50 drugs. The list includes all targets reported for these drugs in  
117 DrugBank, and those with high confidence score, based on experiments, reported in STITCH. Each  
118 chemical-target interaction is annotated with five confidence scores in STITCH: experimental, DB,  
119 text-mining, prediction, and a combination score of the previous four, each ranging from 0 to 1. We  
120 selected the human protein targets with experimental confidence scores of 0.4 or higher.  
121 **Supplementary Table 2** summarizes the 142 targets we identified as well as the associated 445  
122 drug-target interactions.

123 Structure-based and interaction-pattern-based similarities between pairs of drugs were evaluated  
124 using two different criteria. The former was based on *structure-based distance* calculated as the  
125 Tanimoto distance between their 2D structure fingerprints. The Tanimoto distances were evaluated  
126 using Python RDKit suite (RDKit: Open-Source Cheminformatics Software. <https://www.rdkit.org/>).

127 Similarities based on their interactions patterns with known targets were evaluated by evaluating  
128 *target-based distances*. To this aim, we represented each drug  $i$  by a 142-dimensional ‘target vector’  
129  $\mathbf{d}_i$ , the entries of which represent the known targets and are assigned values of 0 or 1, depending on  
130 the existence/observation of an interaction between the corresponding target and drug  $i$ . Interaction-  
131 pattern similarities between drug pairs  $i$  and  $j$  were evaluated by calculating the correlation cosine  
132  $\cos(\mathbf{d}_i \cdot \mathbf{d}_j) = (\mathbf{d}_i \cdot \mathbf{d}_j) / (|\mathbf{d}_i| |\mathbf{d}_j|)$  between these vectors, and the corresponding cosine distance is  $[1 -$   
133  $\cos(\mathbf{d}_i \cdot \mathbf{d}_j)]$ . Likewise, *ligand-based distances* between target pairs  $i$  and  $j$  were evaluated as the  
134 cosine distance between the 50-dimensional vectors  $\mathbf{t}_i$  and  $\mathbf{t}_j$  corresponding to the two targets, the  
135 entries of which are 0 or 1 depending on absence or existence of an interaction between the target and  
136 the corresponding drug of abuse.

## 137 2.2 Probabilistic matrix factorization (PMF) based drug-target interaction prediction

138 Novel targets for each drug were predicted using our probabilistic matrix factorization (PMF) based  
139 machine learning approach (Cobanoglu et al., 2013; Cobanoglu et al., 2015). Briefly, we start with a  
140 sparse matrix  $\mathbf{R}$  representing the known interactions between  $N$  drugs and  $M$  targets. Using the PMF  
141 algorithm, we decomposed  $\mathbf{R}$  into a drug matrix  $\mathbf{U}$  and a target matrix  $\mathbf{V}$ , by learning the optimal  $D$   
142 latent variables to represent each drug and each target. The product of  $\mathbf{U}^T$  and  $\mathbf{V}$  assigns values to the  
143 unknown (experimentally not characterized) entries of the reconstructed  $\mathbf{R}$ , each value representing  
144 the *confidence score* for a novel drug-target interaction prediction

$$\mathbf{R}_{N \times M} = \mathbf{U}_{N \times D}^T \mathbf{V}_{D \times M}$$

145 Using this method, we trained two PMF models, one based on 11,681 drug-target interactions  
146 between 6,640 drugs and 2,255 targets from DrugBank v5, and the other based on 8,579,843  
147 chemical-target interactions for 311,507 chemicals and 9,457 targets from STITCH v5 human  
148 experimentally confirmed subset, respectively. We evaluated the confidence scores in the range  $[0, 1]$   
149 for each predicted drug-target interaction, in both cases. We selected the interactions with confidence  
150 scores higher than 0.7 within the top 10 predicted targets for each input drug. This led to 161 novel  
151 interactions identified between 27 out of the 50 input drugs and 89 targets (composed of 41 known  
152 and 48 novel targets) (**Supplementary Table 3**).

## 153 2.3 Pathway enrichment analysis

154 We mapped the 50 drugs with 142 known and 48 predicted targets to the KEGG pathways (version  
155 December 2017, *homo sapiens*) (Kanehisa et al., 2017). 114 and 173 pathways were mapped by 142  
156 known targets and all targets (both known and predicted) respectively (see **Supplementary Table 4**).  
157 In order to prioritize enriched pathways, we calculated the hypergeometric  $p$ -values based on the  
158 targets as the enrichment score as follows. Given a list of targets, the enrichment  $p$ -value for pathway  
159  $A$  ( $P^A$ ) is the probability of randomly drawing  $k_0$  or more targets that belong to pathway  $A$ :

$$P^A = \sum_{k_0 \leq k \leq m} \frac{\binom{K}{k} \binom{M-K}{m-k}}{\binom{M}{m}}$$

160 where  $M$  is the total number of human proteins in the KEGG Pathway,  $m$  is the total number of  
161 proteins/targets we identified, and  $K$  is the number of proteins that belong to pathway  $A$ , while  $k_0$  is  
162 the number of targets we identified that belong to pathway  $A$ .

## 163 3 Results

### 164 3.1 Functional similarity of drugs of abuse does not imply structural similarity, consistent 165 with the multiplicity of their actions

166 **Figure 1** presents a quantitative analysis of the functional and structural diversity of the examined  $n$   
167 = 50 drugs of abuse, as well as the similarities of their  $m = 142$  targets. The  $n \times n$  maps in panels **A**  
168 and **B** display the drug-drug pairwise distances/dissimilarities based on their 2D fingerprints (panel  
169 **A**), and their interaction patterns with their targets (panel **B**). Panels **C** and **D** display the  
170 corresponding dendrograms. The drugs are indexed and color-coded as in **Supplementary Table 1**  
171 and **Supplementary Figure 1**. As expected, drugs belonging to the same functional category (same  
172 color) exhibit more similar interaction patterns (panel **D**). However, we also note outliers, such as  
173 cocaine lying among opioids, as opposed to its categorization as a CNS stimulant, or promethazine, a  
174 CNS depressant, lying among hallucinogens (shown by *arrows*). The peculiar behavior of cocaine is  
175 consistent with its high promiscuity (see **Figure 2A** for the number of targets associated with each  
176 examined drug). This type of promiscuity becomes even more apparent when the drugs are organized  
177 based on their structure (or 2D fingerprints; see *Materials and Methods*) as may be seen in panel **A**.  
178 For example, opioids (clustered together in panels **B** and **D** based on their interactions) are now  
179 distributed in two or more branches of the dendrogram (*cyan labels/arc*; panel **C**); likewise, CNS  
180 depressants (*blue*) and cannabinoids (*light brown*), grouped each as a single cluster in panel **D**, are  
181 now distributed into two or more clusters in panel **C**.

182 Overall these results suggest that the functional categorization of the drugs does not necessarily  
183 comply with their structural characteristics. The similar functionality presumably originates from  
184 targeting similar pathways, but the difference in the structure suggests that either their targets, or the  
185 binding sites on the same target, are different; or the binding is not selective enough such that  
186 multiple drugs can bind the same site. Consequently, a diversity of pathways or a multiplicity of  
187 cellular responses are triggered by the use and abuse of these drugs.

### 188 3.2 The selected drugs and identified targets are highly diverse and promiscuous

189 We evaluated the similarities between proteins targeted by drugs of abuse, based on their interaction  
190 patterns with the studied drugs of abuse. **Figure 1** panels **E** and **F** display the respective target-target  
191 distances, and corresponding dendrogram. **Supplementary Table 2** lists the full names of these  
192 targets, organized in the same order as the panel **E** axes. We discern several groups of targets  
193 clustered together in consistency with their biological functions. For example, practically all GABA  
194 receptor subtypes (*brown*) are clustered together. This large cluster also includes the riboflavin  
195 transporter 2A (SLC52A2), which may be required for GABA release (Tritsch et al., 2012). On the  
196 other hand, the different subtypes of serotonin (or 5-hydroxytryptamine, 5-HT) receptors (5HTRs)  
197 participate in distinct clusters pointing to the specificity of different subtypes vis-à-vis different drugs  
198 of abuse (*labeled* in **Figure 1F**).

199 The large majority of neurotransmitter transporters, such as  $\text{Na}^+/\text{Cl}^-$ -dependent GABA transporters  
200 (SLC6A1) and glycine transporter (SLC6A9) are in the same cluster (*pink, labeled*). Acetylcholine  
201 receptors also lie close to (or are even interspersed among)  $\text{Na}^+/\text{Cl}^-$ -dependent neurotransmitter  
202 transporters, presumably due to shared drugs such as cocaine. However, the three transporters  
203 playing a crucial role in developing drug addiction, DAT, NE transporter (NET) and serotonin  
204 transporter (SERT) (*labeled* SLC6A2: NET, SLC6A3: DAT, SLC6A4: SERT) are distinguished by  
205 from all other neurotransmitter transporters as a completely disjoint group. The corresponding branch  
206 of the dendrogram (*highlighted by the yellow circle*) also includes vesicular amino acid transporters  
207 and trace amine-associated receptor 1 (TAAR1) known to interact with these transporters (Miller,  
208 2011). We also note in the same branch two seemingly unrelated targets: flavin monoamine oxidase

209 which draws attention to the role of oxidative events; and  $\alpha 2$ -adrenergic receptor subtypes A-C,  
210 which uses NE as a chemical messenger for mediating stimulant effects such as sensitization and  
211 reinstatement of drug seeking, and adenylate cyclase as another messenger to regulate cAMP levels  
212 (Sofuoglu and Sewell, 2009).

213 **Supplementary Table 2** summarizes the 445 known interactions between these 50 drugs and 142  
214 targets. We observe an average of 8.9 interactions per drug and 3.1 interactions per target. There are  
215 23 promiscuous drugs that target at least 10 proteins as shown in **Figure 2** panel A. Cocaine, the  
216 most promiscuous psychostimulant, interacts with 45 known and 3 predicted targets. It is known that  
217 cocaine binds DAT to lock it in the outward-facing state (OFS) and block the reuptake of DA. It  
218 similarly antagonizes SERT and NET (Heikkila et al., 1975; Sora et al., 1998), and also affects  
219 muscarinic acetylcholine receptors (mAChRs) M1 and M2 (Williams and Adinoff, 2008). Our PMF  
220 model also predicted a potential interaction between cocaine and M5. While this interaction is not  
221 listed in current DBs, there is experimental evidence suggesting that M5 plays an important role in  
222 reinforcing the effects of cocaine (Fink-Jensen et al., 2003), in support of the PMF model prediction.

223 The PMF model enables us to predict novel targets. For example, anabolic steroid nandrolone has  
224 only two known interactions, and cannabinoid cannabichromene has one. However, 10 new targets  
225 were predicted with high confidence scores for each of them (**Supplementary Table 3** and  
226 **Supplementary Figure 2A**). This is due to the data available in STITCH DB, which offers a large  
227 training dataset that enhances the performance of our machine learning approach. Overall, 89 new  
228 interactions were predicted for known targets, and 42 novel targets were predicted with 72  
229 interactions. **Figure 2** panel C displays the distribution of all targets among different protein families.  
230 As will be further elaborated below, among the newly identified drug-target pairs, nandrolone-  
231 MAPK14 (mitogen-activated protein kinase 14, also known as p38 $\alpha$ ) and cannabichromene-  
232 IKK $\beta$  (inhibitor of NF $\kappa$ -B kinase subunit  $\beta$ ) play a role in regulating mTORC1 signaling, which will be  
233 shown to be an effector of drug addiction.

234 Turning to targets, three opioid receptors (OPRM1, OPRD1 and OPRL1) exhibit the highest level of  
235 promiscuity (**Supplementary Figure 2B**). The  $\mu$ -type opioid receptor (OPRM1) interacts with 14  
236 known drugs including all opioids as well as ketamine and dextromethorphan. We also predicted a  
237 novel interaction between OPRM1 and the CNS stimulant methylphenidate. This is consistent with  
238 experimental observations that methylphenidate upregulates OPRM1's activity in the reward  
239 circuitry in a mouse model (Zhu et al., 2011). Furthermore, tissue-based transcriptome analysis  
240 (Uhlén et al., 2015) shows that 69% of our 190 targets are expressed in the brain, and 49 of them  
241 show elevated expression levels in the brain compared to other tissue types (**Supplementary Table**  
242 **5**). Among all the targets, NMDA receptor 1 (GRIN1) shows the highest elevated expression. It is  
243 also one of the top 5 enriched genes overall in the brain (Uhlén et al., 2015).

244 Taken together, the 50 selected drugs of abuse and the 142 known and 48 novel targets we identified  
245 cover a diversity of biological functions, are involved in many cellular pathways, and are generally  
246 promiscuous. In order to reveal the common mechanisms that underlie the development and  
247 escalation of drug addiction and also distinguish the effects specific to selected drugs, we proceed  
248 now to a detailed pathway analysis, presented next.

### 249 **3.3 Pathway enrichment analysis reveals the major pathways implicated in various stages of** 250 **addiction development**

251 Our QSP analysis yielded a total of 173 pathways, including 114 associated with the known targets  
252 of the examined dataset of drugs of abuse, and 59 associated with the predicted targets. The detailed  
253 pathway enrichment results can be found in **Supplementary Table 4**. These pathways can be  
254 grouped in five categories (**Figure 3**, **Supplementary Figure 4**, and **Supplementary Table 4**):

255 *Synaptic Neurotransmission (NT)*. Six significantly enriched (with  $p$ -value  $< 0.05$ ) pathways are  
256 associated with synaptic neurotransmission: dopaminergic, serotonergic, glutamatergic, synaptic  
257 vesicle cycle, cholinergic, and GABAergic synapses pathways. 68 known targets and 7 predicted  
258 targets are involved in these pathways. This is consistent with the fact that neurotransmission plays a  
259 dominant role in the rewarding system and is key to drug addiction (Volkow and Morales, 2015).

260 *Signal Transduction (SG)*. 46 intracellular signaling pathways were mapped by 92 targets comprised  
261 of 66 known and 25 predicted targets. Notably, many of these pathways have been reported to play a  
262 role in mediating the effects of drugs of abuse. These include the top five (calcium signaling (Li et  
263 al., 2008), retrograde endocannabinoid signaling (Mechoulam and Parker, 2013), cGMP-PKG  
264 signaling (Shen et al., 2016), cAMP signaling (Philibin et al., 2011), and Rap1 signaling (Cahill et  
265 al., 2016)) as well as some pathways with relatively low enrichment score (i.e.  $0.2 < p$ -value  $< 0.5$ ),  
266 such as TNF signaling (Zhu et al., 2018), MAPK signaling (Sun et al., 2016), PI3K-Akt signaling  
267 (Neasta et al., 2011), NF- $\kappa$ B signaling (Nennig and Schank, 2017), and mTOR signaling (Neasta et  
268 al., 2014). We note that many receptors targeted by drugs of abuse take part in the KEGG  
269 neuroactive ligand-receptor interaction pathway. In the interest of focusing on intracellular signaling  
270 effects, we have not included these in the SG category; they are listed in the ‘Other Pathways’ in  
271 **Supplementary Table 4**.

272 *Autonomic nervous system (ANS)-innervation (ANS)*. We also identified 10 pathways regulating  
273 ANS-innervated systems such as endocrine secretion, taste transduction, and circadian entrainment.  
274 Recent evidences suggested drugs of abuse such as morphine (Al-Hasani and Bruchas, 2011) and  
275 cocaine (Moeller et al., 1997; Prosser et al., 2014) can influence ANS-innervated systems and may  
276 contribute to the withdrawn symptoms associated with drug addiction. 37 known and 9 predicted  
277 targets take part in these pathways.

278 *Neuroplasticity (NP)*. Eight enriched pathways with potential to alter the morphology of neurons,  
279 were found to be related to drug addiction. Among them, long-term potentiation (LTP) and long-term  
280 depression (LTD) are key to reward-related learning and addiction by modifying the fine tuning of  
281 dopaminergic firing (Jones and Bonci, 2005). Axon guidance pathway regulates the growth direction  
282 of neuron cells (Bahi and Dreyer, 2005). Regulation of actin cytoskeleton plays important role in  
283 morphological development and structural changes of neurons (Luo, 2002). Gap junctions connect  
284 neighboring neurons via intercellular channels that allow direct electrical communication (Belousov  
285 and Fontes, 2013) and regulate the efficiency of communication between electrical synapses  
286 (Belousov and Fontes, 2013). Insulin-like growth factor 1 receptor (IGF1R) is predicted as a target of  
287 drug triazolam (**Supplementary Table 4**). IGF1R is involved in LTP, adherens junction and focal  
288 adhesion pathways. It functions via canonical signaling pathways noted above in the SG category,  
289 such as the PI3K-Akt-mTOR and Ras-Raf-MAPK pathways (Lee et al., 2016) and it plays important  
290 role in neuroplasticity (Lee et al., 2016).

291 *Disease-associated pathways (DS)*. 50 enriched pathways are associated with diverse diseases in  
292 different organs such as brain, liver, and lung. They also cover various drug addiction mechanisms  
293 including: nicotine addiction, morphine addiction, cocaine addiction, amphetamine addiction, and  
294 alcoholism. Additionally, there are ‘other pathways’ such as those involved in cell migration,

295 differentiation, immune responses, and metabolic events, which can be seen in **Supplementary**  
296 **Table 4**.

297 Taken together, the enrichment analysis reveals five major categories of pathways that regulate the  
298 three stages of drug addiction cycle: (1) binge and intoxication, (2) withdrawal and negative affect,  
299 and (3) preoccupation and anticipation (or craving) (Koob and Volkow, 2010). Drugs of abuse  
300 directly affect neurotransmission pathways: they increase the accumulation of DA and other  
301 neurotransmitters in the synaptic and extrasynaptic regions, which in turn results in the hedonic  
302 feeling (stage 1) and triggers the DA reward system. Dysregulation of ANS-innervation pathways  
303 may cause negative effects and feelings (stage 2) and feedback to the CNS. Addictive drugs impair  
304 executive processes by disrupting the reward system (neurotransmission pathways) and imparting  
305 morphological changes via neuroplasticity pathways (e.g. LTD and LTP), which then result in  
306 craving (stage 3). Below, we present an in-depth analysis of the role of these pathways or their shared  
307 targets in drug addiction.

### 308 **3.4 Selected targets shared by dominant pathways emerge as common mediators of drug** 309 **addiction**

310 We next analyzed the overlapping targets between the pathways in different functional categories.  
311 We note in particular eight pleiotropic proteins involved in all five categories (at the intersection of  
312 the 5 Venn diagrams in **Figure 3B**: AMPA receptor (subtype GluA2; GRIA2), NMDA receptors 1  
313 and 2A-D (designated as GRIN1, GRIN2A, GRIN2B, GRIN2C and GRIN2D) and voltage-  
314 dependent calcium channel Ca<sub>v</sub>2.1 (or CACNA1A) as well as the predicted target  
315 phosphatidylinositol 3-kinase class 1A catalytic subunit  $\alpha$  (PIK3CA) (**Supplementary Table 4**).  
316 Additionally, 15 proteins are distinguished as targets of four of these major pathways: Serotonin  
317 receptors 5HTR2-A, -B and -C), GABA<sub>A</sub> receptors 1-6 (GABRA1- GABRA6),  $\beta$ -1 adrenergic  
318 receptor 1 (ADRB1), Ras-related C3 botulinum toxin substrate 1 (RAC1; member of Rho family of  
319 GTPases), mAChR M<sub>3</sub> (CHRM3) and DA receptor D<sub>2</sub> (DRD2) and two predicted targets p38 $\alpha$   
320 (MAPK14) and DA receptor D<sub>1</sub> (DRD1).

321 AMPA receptor plays a crucial role in LTP and LTD, which are vital to neuroplasticity, memory and  
322 learning (Volkow et al., 2016). Serotonin receptors, expressed in both the CNS and the peripheral  
323 nervous system (e.g. gastrointestinal tract), are responsible for anxiety, impulsivity, memory, mood,  
324 sleep, thermoregulation, blood pressure, gastrointestinal motility and nausea (Pytliak et al., 2011).  
325 They have been proposed to be therapeutic targets for treating cocaine use disorder (Howell and  
326 Cunningham, 2015). RAC1 is involved in five neuroplasticity pathways, including axon guidance,  
327 adherens junction and tight junction pathways (**Supplementary Table 4**), and 13 intracellular signal  
328 transduction pathways. It regulates neuroplasticity, as well as apoptosis and autophagy (Natsvlishvili  
329 et al., 2015). DA receptor D<sub>2</sub> is a target of 28 drugs of abuse (out of 50 examined here) and is  
330 involved in cAMP signaling, and gap junction pathways, in addition to dopaminergic signaling. It is  
331 implicated in reward mechanisms in the brain (Blum et al., 1996) and the regulation of drug-seeking  
332 behaviors (Edwards et al., 2006). Finally, PI3K turns out to be the most pleiotropic target among  
333 those targeted by drugs of abuse, being involved in 61 pathways identified here, including  
334 neuroplasticity pathways such as axon guidance, and several downstream signaling pathways such as  
335 PI3K-Akt, mTOR, Ras and Jak-STAT pathways.

336 Overall, 23 proteins are distinguished here as highly pleiotropic proteins involved in at least four of  
337 the five major categories of pathways implicated in drug abuse. Most of them are ligand- or voltage-  
338 gated ion channels or neurotransmitter receptors, mainly AMPAR, NMDAR, Cav2.1, mAChR, and



339 serotonin and DA receptors. However, it is interesting to note the targets PI3K and p38 $\alpha$ , not  
340 currently reported in the DBs DrugBank and STITCH, emerge as highly pleiotropic targets of the  
341 drugs of abuse. These are predicted to directly or indirectly affect addiction development. Finally, a  
342 number of proteins take part in specific drug-abuse-related pathways and might serve as targets for  
343 selective treatments. **Supplementary Table 6** provides a list of such targets uniquely implicated in  
344 distinctive pathways.

### 345 **3.5 Pathway enrichment highlights the interference of drugs of abuse with synaptic** 346 **neurotransmission**

347 It is broadly known that neurotransmitters such as DA, 5-HT, NE, endogenous opioids, ACh,  
348 endogenous cannabinoids, Glu and GABA are implicated in drug addiction (Tomkins and Sellers,  
349 2001; Everitt and Robbins, 2005; Parolaro and Rubino, 2008; Benarroch, 2012). Our analysis also  
350 showed the serotonergic synapse ( $p$ -value =  $4.64E-20$ ), GABAergic synapse ( $p$ -value =  $3.45E-19$ ),  
351 cholinergic synapse ( $p$ -value =  $1.64E-08$ ), dopaminergic synapse ( $p$ -value =  $1.25E-07$ ) and  
352 glutamatergic synapse ( $p$ -value =  $1.83E-04$ ) pathways were significantly enriched (**Supplementary**  
353 **Table 4**). A total number of 34 drugs (across six different groups) target at least one of these  
354 pathways. However, the identification of a pathway does not necessarily mean that the drug directly  
355 affects that particular neurotransmitter transport/signaling. There may be indirect effects due to the  
356 crosstalks between synaptic signaling pathways. For example, the ionotropic glutamate receptors  
357 NMDAR and AMPAR are also the downstream mediators in the dopaminergic synapse pathway.  
358 Likewise, GABARs are downstream mediators in the serotonergic synapse pathway.

359 In **Figure 4**, we highlight five major neurotransmission events that directly mediate addiction, and  
360 illustrate how eight drugs of abuse interfere with them. Despite the promiscuity of the drugs of abuse,  
361 some selectively map onto a single synaptic neurotransmission pathway. For example, psilocin (a  
362 hallucinogen whose structure is similar to 5HT (Diaz and Diaz, 1997)) interacts with several types of  
363 5HTRs, regulating serotonergic synapse exclusively (see **Figure 4** and **Supplementary Table 4**). In  
364 contrast, loperamide (not shown) affects all neurotransmission pathways by interacting with the  
365 voltage-dependent P/Q-type calcium channel (VGCC), regulating calcium flux on synapses. Cocaine  
366 targets four of these synaptic neurotransmission events (serotonergic, GABAergic, cholinergic, and  
367 dopaminergic synapses), through its interactions with 5-HT<sub>3</sub>R, sodium- and chloride-dependent  
368 GABA transporter (GAT), muscarinic (M1 and M2) and nicotinic AChRs, and DAT, respectively.  
369 Methadone affects three synaptic neurotransmissions, including serotonergic synapse, dopaminergic  
370 synapse and glutamatergic synapse through the interactions with SERT, DAT, and glutamate  
371 receptors (NMDAR) respectively.

372 It is worth noting that predictions by our PMF model lead to a better understanding of the way drugs  
373 of abuse affect neurotransmissions. In addition to the new role of M5 we discussed in Section 3.2,  
374 our PMF model predicted that cannabichromene, a cannabinoid whose primary target is the transient  
375 receptor (TRPA1), is found to interact with DAT and directly regulate dopaminergic transmission,  
376 which will require further examination. Synaptic neurotransmission events act as upstream signaling  
377 modules that ‘sense’ the early effects of drug abuse. In the next section, we focus on the downstream  
378 signaling events elicited by drug abuse.

### 379 **3.6 mTORC1 emerges as a downstream effector activated by drugs abuse**

380 The calcium-, cAMP-, Rap1-, Ras-, AMPK-, ErbB-, MAPK-, and PI3K-Akt-signaling pathways in  
381 the SG category (**Supplementary Table 4**) crosstalk with each other and form a unified signaling  
382 network. As shown in **Figure 5**, ligand-binding to GPCRs modulates the production of cAMP, which

383 leads to the activation of Rap1. Activated Rap1 modulates the  $\text{Ca}^{2+}$  signaling by inducing the  
384 production of inositol triphosphate ( $\text{IP}_3$ ) and also activates the PI3K-Akt signaling cascade.  
385 Stimulations of ErbB family of receptor tyrosine kinases (related to epidermal growth factor receptor  
386 EGFR) as well as insulin-like growth factor receptor IGF1R trigger both PI3K-Akt and MAPK  
387 signaling cascades (proteins colored *blue* in **Figure 5**). Notably all these pathways merge and  
388 regulate a group of downstream proteins (shown in *dark yellow* in **Figure 5**); and at the center of this  
389 cluster lies the mammalian target of rapamycin (mTOR) complex 1 (mTORC1) which is likely to be  
390 synergistically regulated by all these merging pathways.

391 mTORC1 is not only a master regulator of autophagy (Rabanal-Ruiz et al., 2017), but also controls  
392 protein synthesis and transcription (Ma and Blenis, 2009). It has been reported to promote  
393 neuroadaptation following exposure to drugs of abuse including cocaine, alcohol, morphine and  $\Delta^9$ -  
394 tetrahydrocannabinol (THC) (Neasta et al., 2014). Our results suggest that mTORC1 may act as a  
395 universal effector of the cellular response to drug abuse at an advanced (preoccupation and  
396 anticipation, or craving) stage, controlling the synthesis of selected proteins and ensuing cell growth,  
397 which may result in persistent alterations in the dendritic morphology and neuronal circuitry.

398 In **Figure 5**, selected interactions between drugs from different substance groups and their targets are  
399 highlighted using *gray* arrows. Our PMF model predicted that diazepam would interact with PI3K to  
400 influence mTORC1 signaling (*dashed gray arrows* denote predictions). It has been reported that  
401 Ro5-4864, a benzodiazepine derivative of diazepam suppresses activation of PI3K (Yousefi et al.,  
402 2013), which corroborates our prediction. We further predicted that cannabichromene may interact  
403 with I $\kappa$ B kinase  $\beta$  (IKK $\beta$ ) to regulate mTORC1 by inhibiting TSC1/2. Interestingly, another  
404 cannabinoid arachidonylethanolamine is known to directly inhibits IKK $\beta$  (Sancho et al., 2003).  
405 Taken together, our results identified a unified network that underlies the development of drugs  
406 addiction, in which mTORC1 appears to play a key effector role.

#### 407 **4 Discussion**

408 In the present study we focused on the targets and pathways affected by drugs of abuse, toward  
409 gaining a systems-level understanding of key players and dominant interactions that control the  
410 response to drug abuse and the development of drug addiction. Using machine learning methods, we  
411 focused on 50 drugs of abuse that form a chemically and functionally diverse set, and analyzed their  
412 142 targets as well as the corresponding cellular pathways and their crosstalk. Our analysis  
413 identified:

- 414 (i) 48 additional proteins targeted by drugs of abuse, including PIK3CA, IKBKB, EGFR, and  
415 IGF1R, are shown to be key mediators of downstream effects of drug abuse.
- 416 (ii) 161 new interactions between the drugs of abuse and the known and predicted targets,  
417 including those between cocaine and M5, methylphenidate and OPRM1, and diazepam and  
418 PI3K, not reported in existing DBs, but supported by prior experiments, and others (e.g. the  
419 interactions of cannabichromene with IKBKB and DAT) that await experimental validation.
- 420 (iii) A dataset of 70 pathways, composed of 6 neurotransmission pathways, 46 signal transduction  
421 pathways, 8 neuroplasticity pathways and 10 autonomic nervous system innervation pathways  
422 which are proposed to govern different stages of the molecular, cellular and tissue level  
423 responses to drug abuse and in addiction development.

424 Overall, our comprehensive analysis led to new hypotheses on drug-target interactions and signaling  
425 and regulation mechanism elicited by drugs of abuse in general, along with those on selected targets

426 and pathways for specific drugs. Below we elaborate on the biological and biomedical implications  
427 of these findings.

#### 428 **4.1 Persistent restructuring in neuronal systems as a feature underlying drug addiction**

429 Enriched pathways in the neuroplasticity category include gap junction, LTP, LDP, adherens  
430 junction, regulation of actin cytoskeleton, focal adhesion, axon guidance, and tight junction  
431 (**Supplementary Table 4**). These are responsible for the changes in the morphology of dendrites. For  
432 instance, DA regulates excitatory synaptic plasticity by modulating the strength and size of synapses  
433 through LTP and LTD (De Roo et al., 2008; Volkow and Morales, 2015). The restructuring of  
434 dendritic spines involves the rearrangements of cytoskeleton and actin-myosin (Volkow and Morales,  
435 2015). The axon guidance molecules guide the direction of neuronal growth.

436 Drugs of abuse can induce the changes in CNS through these pathways. For example, chronic  
437 exposure to cocaine increases dendritic spine density in medium spiny neurons (Russo et al., 2010).  
438 The disruption in axon guidance pathway and alteration in synaptic geometry can result in drug-  
439 related plasticity (Bahi and Dreyer, 2005). The persistent restructuring in the CNS caused by drugs of  
440 abuse is responsible for long-term behavioral plasticity driving addiction (Volkow et al., 2003; Russo  
441 et al., 2010; Volkow and Morales, 2015). As will be further discussed below, mTORC1 plays a  
442 central role in the synthesis of new proteins (e.g. AMPARs) and thereby neuronal (dendrites) growth,  
443 alteration of the synaptic geometry and therefore rewiring of the neuronal circuitry.

#### 444 **4.2 ANS may mediate the negative-reinforcement of drug addiction**

445 Our results further show that the pathways regulating ANS-innervated systems are associated with  
446 drugs of abuse. As the NP pathways may influence the neuroplasticity in the ANS, we hypothesize  
447 that drugs of abuse may induce the persistent restructuring in ANS as well. The drug-related  
448 plasticity in ANS may lead to the dysregulation of ANS-innervated systems and cause negative  
449 effects and feelings during the second stage of drug addiction.

450 Drug addiction is well known as a brain disease (Volkow and Morales, 2015). However, many drugs  
451 of abuse can disrupt the activity of ANS and cause disorders in ANS-innervated systems (Al-Hasani  
452 and Bruchas, 2011; Huang, 2017). For example, opioids (e.g. morphine) alter neuronal excitability  
453 and neurotransmission in the ANS (Wood and Galligan, 2004), and induce disorders in  
454 gastrointestinal system, smooth muscle, skin, cardiovascular, and immune system (Al-Hasani and  
455 Bruchas, 2011). Cannabinoids (e.g. THC) modulate the exocytotic NE release in ANS-innervated  
456 organs through presynaptic cannabinoid receptors (Ishac et al., 1996).

457 The pathways we identified in the ANS category regulate insulin secretion, gastric acid secretion,  
458 vascular smooth muscle contraction, pancreatic secretion, salivary secretion and renin secretion  
459 (**Supplementary Table 4**). Their dysfunction may be associated with the autonomic withdrawal  
460 syndrome, such as thermoregulatory disorder (chills and sweats) and gastrointestinal upset  
461 (abdominal cramps and diarrhea), which has been observed in drug/substance users (Wise and Koob,  
462 2014). In addition, the stress and depression caused by these negative effects may be part of the  
463 negative reinforcement of drug addiction (Self and Nestler, 1995; Koob and Le Moal, 2001). In other  
464 words, the drug induced ANS disorders can feedback to CNS and mediate the negative  
465 reinforcement. Compared to the structural changes in CNS, the disorder and persistent restructuring  
466 in ANS is less studied and it could be a future direction in the study of development of drug addiction  
467 and related diseases.

### 468 **4.3 mTORC1 signaling plays a key role in mediating cellular morphological changes in** 469 **response to continued drug abuse**

470 The functioning and regulation of mTOR signaling has been elucidated over the past two decades. It  
471 became clear that mTORC1 plays a crucial role in regulating diverse cellular processes including  
472 protein synthesis, autophagy, lipid metabolism, and mitochondrial biogenesis (Saxton and Sabatini,  
473 2017). In the brain, mTORC1 coordinates neural development, circuit formation, synaptic plasticity,  
474 and long-term memory (Lipton and Sahin, 2014). The dysregulation of mTORC1 pathway is  
475 associated with many neurodevelopmental and neurodegenerative diseases such as Parkinson's  
476 disease and Alzheimer's disease. mTORC1 been noted to be an important mediator of the  
477 development of drug addiction and relapse vulnerability (Dayas et al., 2012). Accumulating  
478 evidences show that pharmacological inhibition of mTORC1 (often through rapamycin treatment)  
479 can prevent sensitization of methamphetamine-induced place preference (Narita et al., 2005), reduce  
480 craving in heroin addicts (Shi et al., 2009), attenuate the expression of alcohol-induced locomotor  
481 sensitization (Neasta et al., 2010), suppress the expression of cocaine-induced place preference  
482 (Bailey et al., 2012), protect against the expression of drug-seeking and relapse by reducing AMPAR  
483 (GluA1) and CaMKII levels (James et al., 2014), and inhibit reconsolidation of morphine-associated  
484 memories (Lin et al., 2014).

485 Our unbiased computational analysis based on a diverse set of 50 drugs of abuse supports the  
486 hypothesis that mTORC1 may act as a universal effector or controller for neuroadaptations induced  
487 by drugs of abuse (Neasta et al., 2014). The major signal transduction pathways we identified that  
488 involve targets of drugs of abuse interconnect and converge to the mTORC1 signaling cascade  
489 (**Figure 5**). Most drugs of abuse in our list target upstream regulators of mTORC1, including  
490 membrane receptors (e.g. GPCRs, RTKs and NMDAR), kinases (e.g. PI3K, p38 $\alpha$ , and IKK $\beta$ ), and  
491 ion channels (e.g. Cav2.1 and TRPV2). Notably, the drug-related impact of some of these targets has  
492 been experimentally confirmed. For example, blockade of NMDAR using MK801 reduces the  
493 amnesic-like effects of cannabinoid THC (Puighermanal et al., 2009). Likewise, PI3K inhibitor  
494 LY294002 can suppress morphine place preference (Cui et al., 2010) and the expression of cocaine-  
495 sensitization (Izzo et al., 2002).

496 The downstream effectors of mTORC1, which specifically mediate drug behavioral plasticity is far  
497 from known. mTORC1 can mediate the activation of S6Ks and 4E-BPs, which leads to increased  
498 production of proteins required for synaptic plasticity including AMPAR and PSD-95 (Dayas et al.,  
499 2012). EM reconstruction of hippocampal neuropil showed the variability in the size and shape of  
500 dendrites depending on synaptic activity (Bartol Jr et al., 2015), which in turn correlates with  
501 information storage. Recently studies have revealed that Atg5- and Atg7-dependent autophagy in  
502 dopaminergic neurons regulates cellular and behavioral responses to morphine (Su et al., 2017).  
503 Cocaine exposure results in ER stress-induced and mTORC1-dependent autophagy (Guo et al.,  
504 2015). Fentanyl induces autophagy via activation of ROS/MAPK pathway (Yao et al., 2016).  
505 Methamphetamine induces autophagy through the  $\kappa$ -opioid receptor (Ma et al., 2014). These  
506 observations are all consistent with the conclusion drawn here with regard to the role of mTORC1 as  
507 a major effector of cellular responses to drug addiction.

### 508 **4.4 Drug repurposing opportunities for combatting drug addiction**

509 Autophagy modulating drugs have been shown to have therapeutic effects against liver and lung  
510 diseases. The signaling network presented in **Figure 5** involves many targets of such drugs. For  
511 instance, carbamazepine affects IP<sub>3</sub> production and enhances autophagy via calcium-AMPK-  
512 mTORC1 pathway (Hidvegi et al., 2010). It has been identified as a potential drug for treating  $\alpha$ 1-

513 antitrypsin deficiency, hepatic fibrosis, and lung proteinopathy (Hidvegi et al., 2010; Hidvegi et al.,  
514 2015). Rapamycin is a potential drug for lung disease such as fibrosis (Abdulrahman et al., 2011;  
515 Patel et al., 2012). Other liver and lung drugs which facilitate the removal of aggregates by  
516 promoting autophagy may also affect drug-related neurodegenerative disorders. **Supplementary**  
517 **Table 7** summarizes 15 autophagy-modulating drugs for liver and lung diseases. Target identification  
518 and pathway analysis of this subset of drugs using the same protocol as those adopted for the 50  
519 drugs of abuse indeed confirmed that drugs of abuse and liver/lung drugs share many common  
520 pathways (**Supplementary Figure 5**). Notably, among those pathways, neuroactive ligand-receptor  
521 interactions, calcium signaling, and serotonergic synapse pathways are among the top 10 enriched  
522 pathways of both drugs of abuse and liver/lung drugs. Amphetamine addiction and alcoholism are  
523 also enriched by targets of liver/lung drugs. Thus, an interesting future direction is to examine  
524 whether autophagy modulating drugs for liver and lung diseases could be repurposed, if necessary by  
525 suitable refinements to increase their selectivity, for treating drug addiction.

## 526 **5 Conflict of Interest**

527 *The authors declare that the research was conducted in the absence of any commercial or financial*  
528 *relationships that could be construed as a potential conflict of interest.*

## 529 **6 Author Contributions**

530 FP, HL and IB conceived and designed the research. FP and HL performed the research. FP, HL, BL  
531 and IB analysed the results. FP, HL, BL and IB wrote the manuscript.

## 532 **7 Funding**

533 This work was supported by the *National Institutes of Health awards P30DA035778, and*  
534 *P41GM103712.*

## 535 **8 Acknowledgments**

536 FP wish to thank Dr. D. Lansing Taylor for his mentorship.

## 537 **9 References**

- 538 Abdulrahman, B.A., Khweek, A.A., Akhter, A., Caution, K., Kotrange, S., Abdelaziz, D.H., et al.  
539 (2011). Autophagy stimulation by rapamycin suppresses lung inflammation and infection by  
540 *Burkholderia cenocepacia* in a model of cystic fibrosis. *Autophagy* 7(11), 1359-1370. doi:  
541 10.4161/auto.7.11.17660.
- 542 Al-Hasani, R., and Bruchas, M.R. (2011). Molecular mechanisms of opioid receptor-dependent  
543 signaling and behavior. *Anesthesiology* 115(6), 1363-1381.
- 544 Bahi, A., and Dreyer, J.L. (2005). Cocaine-induced expression changes of axon guidance molecules  
545 in the adult rat brain. *Mol Cell Neurosci* 28(2), 275-291. doi: 10.1016/j.mcn.2004.09.011.
- 546 Bailey, J., Ma, D., and Szumlinski, K.K. (2012). Rapamycin attenuates the expression of cocaine-  
547 induced place preference and behavioral sensitization. *Addict Biol* 17(2), 248-258. doi:  
548 10.1111/j.1369-1600.2010.00311.x.
- 549 Bartol Jr, T.M., Bromer, C., Kinney, J., Chirillo, M.A., Bourne, J.N., Harris, K.M., et al. (2015).  
550 Nanoconnectomic upper bound on the variability of synaptic plasticity. *Elife* 4, e10778.

- 551 Belousov, A.B., and Fontes, J.D. (2013). Neuronal gap junctions: making and breaking connections  
552 during development and injury. *Trends Neurosci* 36(4), 227-236.
- 553 Benarroch, E.E. (2012). Endogenous opioid systems: current concepts and clinical correlations.  
554 *Neurology* 79(8), 807-814. doi: 10.1212/WNL.0b013e3182662098.
- 555 Biernacka, J.M., Geske, J., Jenkins, G.D., Colby, C., Rider, D.N., Karpyak, V.M., et al. (2013).  
556 Genome-wide gene-set analysis for identification of pathways associated with alcohol  
557 dependence. *Int J Neuropsychopharmacol* 16(2), 271-278. doi:  
558 10.1017/S1461145712000375.
- 559 Blum, K., Sheridan, P.J., Wood, R.C., Braverman, E.R., Chen, T.J., Cull, J.G., et al. (1996). The D2  
560 dopamine receptor gene as a determinant of reward deficiency syndrome. *J R Soc Med* 89(7),  
561 396-400.
- 562 Cahill, M.E., Bagot, R.C., Gancarz, A.M., Walker, D.M., Sun, H., Wang, Z.J., et al. (2016).  
563 Bidirectional Synaptic Structural Plasticity after Chronic Cocaine Administration Occurs  
564 through Rap1 Small GTPase Signaling. *Neuron* 89(3), 566-582. doi:  
565 10.1016/j.neuron.2016.01.031.
- 566 Chen, X., Yan, C.C., Zhang, X., Zhang, X., Dai, F., Yin, J., et al. (2016). Drug-target interaction  
567 prediction: databases, web servers and computational models. *Brief Bioinform* 17(4), 696-  
568 712. doi: 10.1093/bib/bbv066.
- 569 Coates, K.M., and Flood, P. (2001). Ketamine and its preservative, benzethonium chloride, both  
570 inhibit human recombinant  $\alpha 7$  and  $\alpha 4\beta 2$  neuronal nicotinic acetylcholine receptors in  
571 *Xenopus* oocytes. *Br J Pharmacol* 134(4), 871-879.
- 572 Cobanoglu, M.C., Liu, C., Hu, F., Oltvai, Z.N., and Bahar, I. (2013). Predicting drug-target  
573 interactions using probabilistic matrix factorization. *J Chem Inf Model* 53(12), 3399-3409.  
574 doi: 10.1021/ci400219z.
- 575 Cobanoglu, M.C., Oltvai, Z.N., Taylor, D.L., and Bahar, I. (2015). BalestraWeb: efficient online  
576 evaluation of drug-target interactions. *Bioinformatics* 31(1), 131-133. doi:  
577 10.1093/bioinformatics/btu599.
- 578 Collingridge, G.L., Kehl, S.J., and McLennan, H. (1983). Excitatory amino acids in synaptic  
579 transmission in the Schaffer collateral-commissural pathway of the rat hippocampus. *J*  
580 *Physiol* 334, 33-46.
- 581 Cui, Y., Zhang, X., Cui, Y., Xin, W., Jing, J., and Liu, X. (2010). Activation of phosphatidylinositol  
582 3-kinase/Akt-mammalian target of Rapamycin signaling pathway in the hippocampus is  
583 essential for the acquisition of morphine-induced place preference in rats. *Neuroscience*  
584 171(1), 134-143.
- 585 Dayas, C.V., Smith, D.W., and Dunkley, P.R. (2012). An emerging role for the mammalian target of  
586 rapamycin in "pathological" protein translation: relevance to cocaine addiction. *Front*  
587 *Pharmacol* 3, 13.
- 588 De Roo, M., Klauser, P., Garcia, P.M., Poglia, L., and Muller, D. (2008). Spine dynamics and  
589 synapse remodeling during LTP and memory processes. *Prog Brain Res* 169, 199-207.
- 590 Diaz, J., and Diaz, J. (1997). *How drugs influence behavior: A neuro-behavioral approach*. Prentice  
591 Hall.
- 592 Edwards, S., Whisler, K.N., Fuller, D.C., Orsulak, P.J., and Self, D.W. (2006). Addiction-Related  
593 Alterations in D1 and D2 Dopamine Receptor Behavioral Responses Following Chronic

- 594 Cocaine Self-Administration. *Neuropsychopharmacology* 32, 354. doi:  
595 10.1038/sj.npp.1301062.
- 596 Everitt, B.J., and Robbins, T.W. (2005). Neural systems of reinforcement for drug addiction: from  
597 actions to habits to compulsion. *Nat Neurosci* 8(11), 1481.
- 598 Fink-Jensen, A., Fedorova, I., Wortwein, G., Woldbye, D.P., Rasmussen, T., Thomsen, M., et al.  
599 (2003). Role for M5 muscarinic acetylcholine receptors in cocaine addiction. *J Neurosci Res*  
600 74(1), 91-96. doi: 10.1002/jnr.10728.
- 601 Guo, M.L., Liao, K., Periyasamy, P., Yang, L., Cai, Y., Callen, S.E., et al. (2015). Cocaine-mediated  
602 microglial activation involves the ER stress-autophagy axis. *Autophagy* 11(7), 995-1009. doi:  
603 10.1080/15548627.2015.1052205.
- 604 Heikkila, R.E., Orlansky, H., and Cohen, G. (1975). Studies on the distinction between uptake  
605 inhibition and release of [3H] dopamine in rat brain tissue slices. *Biochem Pharmacol* 24(8),  
606 847-852.
- 607 Hevers, W., Hadley, S.H., Lüddens, H., and Amin, J. (2008). Ketamine, but not phencyclidine,  
608 selectively modulates cerebellar GABAA receptors containing  $\alpha 6$  and  $\delta$  subunits. *J Neurosci*  
609 28(20), 5383-5393.
- 610 Hidvegi, T., Ewing, M., Hale, P., Dippold, C., Beckett, C., Kemp, C., et al. (2010). An autophagy-  
611 enhancing drug promotes degradation of mutant alpha1-antitrypsin Z and reduces hepatic  
612 fibrosis. *Science* 329(5988), 229-232. doi: 10.1126/science.1190354.
- 613 Hidvegi, T., Stolz, D.B., Alcorn, J.F., Yousem, S.A., Wang, J., Leme, A.S., et al. (2015). Enhancing  
614 Autophagy with Drugs or Lung-directed Gene Therapy Reverses the Pathological Effects of  
615 Respiratory Epithelial Cell Proteinopathy. *J Biol Chem* 290(50), 29742-29757. doi:  
616 10.1074/jbc.M115.691253.
- 617 Hirota, K., Hashimoto, Y., and Lambert, D.G. (2002). Interaction of intravenous anesthetics with  
618 recombinant human M1-M3 muscarinic receptors expressed in chinese hamster ovary cells.  
619 *Anesthesia & Analgesia* 95(6), 1607-1610.
- 620 Howell, L.L., and Cunningham, K.A. (2015). Serotonin 5-HT<sub>2</sub> receptor interactions with dopamine  
621 function: implications for therapeutics in cocaine use disorder. *Pharmacol Rev* 67(1), 176-  
622 197.
- 623 Hu, Y., Fang, Z., Yang, Y., Rohlsen-Neal, D., Cheng, F., and Wang, J. (2018). Analyzing the genes  
624 related to nicotine addiction or schizophrenia via a pathway and network based approach. *Sci*  
625 *Rep* 8(1), 2894. doi: 10.1038/s41598-018-21297-x.
- 626 Huang, A.C.W. (2017). Autonomic nervous system and brain circuitry for internet addiction, in  
627 *Internet Addiction*. Springer, 161-180.
- 628 Hustveit, O., Maurset, A., and Øye, I. (1995). Interaction of the chiral forms of ketamine with opioid,  
629 phencyclidine,  $\sigma$  and muscarinic receptors. *Pharmacol Toxicol* 77(6), 355-359.
- 630 Ishac, E.J., Jiang, L., Lake, K.D., Varga, K., Abood, M.E., and Kunos, G. (1996). Inhibition of  
631 exocytotic noradrenaline release by presynaptic cannabinoid CB 1 receptors on peripheral  
632 sympathetic nerves. *Br J Pharmacol* 118(8), 2023-2028.
- 633 Izzo, E., Martin-Fardon, R., Koob, G.F., Weiss, F., and Sanna, P.P. (2002). Neural plasticity and  
634 addiction: PI3-kinase and cocaine behavioral sensitization. *Nat Neurosci* 5(12), 1263-1264.  
635 doi: 10.1038/nn977.

- 636 James, M.H., Quinn, R.K., Ong, L.K., Levi, E.M., Charnley, J.L., Smith, D.W., et al. (2014).  
637 mTORC1 inhibition in the nucleus accumbens ‘protects’ against the expression of drug  
638 seeking and ‘relapse’ and is associated with reductions in GluA1 AMPAR and CAMKII $\alpha$   
639 levels. *Neuropsychopharmacology* 39(7), 1694.
- 640 Jones, S., and Bonci, A. (2005). Synaptic plasticity and drug addiction. *Curr Opin Pharmacol* 5(1),  
641 20-25. doi: 10.1016/j.coph.2004.08.011.
- 642 Kanehisa, M., Furumichi, M., Tanabe, M., Sato, Y., and Morishima, K. (2017). KEGG: new  
643 perspectives on genomes, pathways, diseases and drugs. *Nucleic Acids Res* 45(D1), D353-  
644 D361. doi: 10.1093/nar/gkw1092.
- 645 Kapur, S., and Seeman, P. (2002). NMDA receptor antagonists ketamine and PCP have direct effects  
646 on the dopamine D<sub>2</sub> and serotonin 5-HT<sub>2</sub> receptors—implications for models of  
647 schizophrenia. *Mol Psychiatry* 7(8), 837.
- 648 Koob, G.F., and Le Moal, M. (2001). Drug addiction, dysregulation of reward, and allostasis.  
649 *Neuropsychopharmacology* 24(2), 97.
- 650 Koob, G.F., and Volkow, N.D. (2010). Neurocircuitry of addiction. *Neuropsychopharmacology*  
651 35(1), 217.
- 652 Koob, G.F., and Volkow, N.D. (2016). Neurobiology of addiction: a neurocircuitry analysis. *Lancet*  
653 *Psychiatry* 3(8), 760-773. doi: 10.1016/S2215-0366(16)00104-8.
- 654 Lee, H.T., Chang, H.T., Lee, S., Lin, C.H., Fan, J.R., Lin, S.Z., et al. (2016). Role of IGF1R(+)  
655 MSCs in modulating neuroplasticity via CXCR4 cross-interaction. *Sci Rep* 6, 32595. doi:  
656 10.1038/srep32595.
- 657 Li, C.Y., Mao, X., and Wei, L. (2008). Genes and (common) pathways underlying drug addiction.  
658 *PLoS Comput Biol* 4(1), e2. doi: 10.1371/journal.pcbi.0040002.
- 659 Lin, J., Liu, L., Wen, Q., Zheng, C., Gao, Y., Peng, S., et al. (2014). Rapamycin prevents drug  
660 seeking via disrupting reconsolidation of reward memory in rats. *Int J*  
661 *Neuropsychopharmacol* 17(1), 127-136. doi: 10.1017/S1461145713001156.
- 662 Lipton, J.O., and Sahin, M. (2014). The neurology of mTOR. *Neuron* 84(2), 275-291.
- 663 Luo, L. (2002). Actin cytoskeleton regulation in neuronal morphogenesis and structural plasticity.  
664 *Annu Rev Cell Dev Biol* 18(1), 601-635. doi: 10.1146/annurev.cellbio.18.031802.150501.
- 665 Ma, J., Wan, J., Meng, J., Banerjee, S., Ramakrishnan, S., and Roy, S. (2014). Methamphetamine  
666 induces autophagy as a pro-survival response against apoptotic endothelial cell death through  
667 the Kappa opioid receptor. *Cell Death Dis* 5:e1099. doi: 10.1038/cddis.2014.64.
- 668 Ma, X.M., and Blenis, J. (2009). Molecular mechanisms of mTOR-mediated translational control.  
669 *Nat Rev Mol Cell Biol* 10(5), 307.
- 670 Mechoulam, R., and Parker, L.A. (2013). The endocannabinoid system and the brain. *Annu Rev*  
671 *Psychol* 64, 21-47. doi: 10.1146/annurev-psych-113011-143739.
- 672 Mendelsohn, L.G., Kalra, V., Johnson, B.G., and Kerchner, G.A. (1985). Sigma opioid receptor:  
673 characterization and co-identity with the phencyclidine receptor. *J Pharmacol Exp Ther*  
674 233(3), 597-602.



- 675 Miller, G.M. (2011). The emerging role of trace amine-associated receptor 1 in the functional  
676 regulation of monoamine transporters and dopaminergic activity. *J Neurochem* 116(2), 164-  
677 176.
- 678 Moeller, F.G., Dougherty, D.M., Rustin, T., Swann, A.C., Allen, T.J., Shah, N., et al. (1997).  
679 Antisocial personality disorder and aggression in recently abstinent cocaine dependent  
680 subjects. *Drug Alcohol Depend* 44(2-3), 175-182.
- 681 Narita, M., Akai, H., Kita, T., Nagumo, Y., Narita, M., Sunagawa, N., et al. (2005). Involvement of  
682 mitogen-stimulated p70-S6 kinase in the development of sensitization to the  
683 methamphetamine-induced rewarding effect in rats. *Neuroscience* 132(3), 553-560. doi:  
684 10.1016/j.neuroscience.2004.12.050.
- 685 Natsvlshvili, N., Gogvadze, N., Zhuravliova, E., and Mikeladze, D. (2015). Sigma-1 receptor  
686 directly interacts with Rac1-GTPase in the brain mitochondria. *BMC Biochem* 16(1), 11.
- 687 Neasta, J., Barak, S., Ben Hamida, S., and Ron, D. (2014). mTOR complex 1: a key player in  
688 neuroadaptations induced by drugs of abuse. *J Neurochem* 130(2), 172-184. doi:  
689 10.1111/jnc.12725.
- 690 Neasta, J., Ben Hamida, S., Yowell, Q., Carnicella, S., and Ron, D. (2010). Role for mammalian  
691 target of rapamycin complex 1 signaling in neuroadaptations underlying alcohol-related  
692 disorders. *Proc Natl Acad Sci U S A* 107(46), 20093-20098. doi: 10.1073/pnas.1005554107.
- 693 Neasta, J., Hamida, S.B., Yowell, Q.V., Carnicella, S., and Ron, D. (2011). AKT signaling pathway  
694 in the nucleus accumbens mediates excessive alcohol drinking behaviors. *Biol Psychiatry*  
695 70(6), 575-582.
- 696 Nennig, S.E., and Schank, J.R. (2017). The Role of NFkB in Drug Addiction: Beyond Inflammation.  
697 *Alcohol Alcohol* 52(2), 172-179. doi: 10.1093/alcalc/agw098.
- 698 Nestler, E.J. (2013). Cellular basis of memory for addiction. *Dialogues Clin Neurosci* 15(4), 431.
- 699 Okamoto, T., Minami, K., Uezono, Y., Ogata, J., Shiraishi, M., Shigematsu, A., et al. (2003). The  
700 inhibitory effects of ketamine and pentobarbital on substance p receptors expressed in  
701 *Xenopus oocytes*. *Anesth Analg* 97(1), 104-110.
- 702 Parolaro, D., and Rubino, T. (2008). The role of the endogenous cannabinoid system in drug  
703 addiction. *Drug News Perspect* 21(3), 149-157.
- 704 Patel, A.S., Lin, L., Geyer, A., Haspel, J.A., An, C.H., Cao, J., et al. (2012). Autophagy in idiopathic  
705 pulmonary fibrosis. *PLoS One* 7(7), e41394. doi: 10.1371/journal.pone.0041394.
- 706 Philibin, S.D., Cortes, A., Self, D.W., and Bibb, J.A. (2011). Striatal signal transduction and drug  
707 addiction. *Front Neuroanat* 5, 60.
- 708 Prosser, R.A., Stowie, A., Amicarelli, M., Nackenoff, A.G., Blakely, R.D., and Glass, J.D. (2014).  
709 Cocaine modulates mammalian circadian clock timing by decreasing serotonin transport in  
710 the SCN. *Neuroscience* 275, 184-193.
- 711 Puighermanal, E., Marsicano, G., Busquets-Garcia, A., Lutz, B., Maldonado, R., and Ozaita, A.  
712 (2009). Cannabinoid modulation of hippocampal long-term memory is mediated by mTOR  
713 signaling. *Nat Neurosci* 12(9), 1152.
- 714 Pytliak, M., Vargová, V., Mechírová, V., and Felsöci, M. (2011). Serotonin receptors-from molecular  
715 biology to clinical applications. *Physiol Res* 60(1), 15.

- 716 Rabanal-Ruiz, Y., Otten, E.G., and Korolchuk, V.I. (2017). mTORC1 as the main gateway to  
717 autophagy. *Essays Biochem* 61(6), 565-584.
- 718 Rocha, B.A., Fumagalli, F., Gainetdinov, R.R., Jones, S.R., Ator, R., Giros, B., et al. (1998). Cocaine  
719 self-administration in dopamine-transporter knockout mice. *Nat Neurosci* 1(2), 132-137. doi:  
720 10.1038/381.
- 721 Russo, S.J., Dietz, D.M., Dumitriu, D., Morrison, J.H., Malenka, R.C., and Nestler, E.J. (2010). The  
722 addicted synapse: mechanisms of synaptic and structural plasticity in nucleus accumbens.  
723 *Trends Neurosci* 33(6), 267-276. doi: 10.1016/j.tins.2010.02.002.
- 724 Sancho, R.o., Calzado, M.A., Di Marzo, V., Appendino, G., and Muñoz, E. (2003). Anandamide  
725 inhibits nuclear factor- $\kappa$ B activation through a cannabinoid receptor-independent pathway.  
726 *Mol Pharmacol* 63(2), 429-438.
- 727 Saxton, R.A., and Sabatini, D.M. (2017). mTOR signaling in growth, metabolism, and disease. *Cell*  
728 168(6), 960-976.
- 729 Self, D.W., and Nestler, E.J. (1995). Molecular mechanisms of drug reinforcement and addiction.  
730 *Annu Rev Neurosci* 18, 463-495. doi: 10.1146/annurev.ne.18.030195.002335.
- 731 Shen, F., Wang, X.-W., Ge, F.-F., Li, Y.-J., and Cui, C.-L. (2016). Essential role of the NO signaling  
732 pathway in the hippocampal CA1 in morphine-associated memory depends on glutaminergic  
733 receptors. *Neuropharmacology* 102, 216-228.
- 734 Shi, J., Jun, W., Zhao, L.Y., Xue, Y.X., Zhang, X.Y., Kosten, T.R., et al. (2009). Effect of rapamycin  
735 on cue-induced drug craving in abstinent heroin addicts. *Eur J Pharmacol* 615(1-3), 108-112.  
736 doi: 10.1016/j.ejphar.2009.05.011.
- 737 Shimada, S., Kitayama, S., Lin, C.L., Patel, A., Nanthakumar, E., Gregor, P., et al. (1991). Cloning  
738 and expression of a cocaine-sensitive dopamine transporter complementary DNA. *Science*  
739 254(5031), 576-578.
- 740 Sofuoglu, M., and Sewell, R.A. (2009). Norepinephrine and stimulant addiction. *Addiction biology*  
741 14(2), 119-129.
- 742 Sora, I., Wichems, C., Takahashi, N., Li, X.F., Zeng, Z., Revay, R., et al. (1998). Cocaine reward  
743 models: conditioned place preference can be established in dopamine- and in serotonin-  
744 transporter knockout mice. *Proc Natl Acad Sci U S A* 95(13), 7699-7704.
- 745 Stern, A.M., Schurdak, M.E., Bahar, I., Berg, J.M., and Taylor, D.L. (2016). A Perspective on  
746 Implementing a Quantitative Systems Pharmacology Platform for Drug Discovery and the  
747 Advancement of Personalized Medicine. *J Biomol Screen* 21(6), 521-534. doi:  
748 10.1177/1087057116635818.
- 749 Su, L.Y., Luo, R., Liu, Q., Su, J.R., Yang, L.X., Ding, Y.Q., et al. (2017). Atg5- and Atg7-dependent  
750 autophagy in dopaminergic neurons regulates cellular and behavioral responses to morphine.  
751 *Autophagy* 13(9), 1496-1511. doi: 10.1080/15548627.2017.1332549.
- 752 Sun, W.L., Quizon, P.M., and Zhu, J. (2016). Molecular Mechanism: ERK Signaling, Drug  
753 Addiction, and Behavioral Effects. *Prog Mol Biol Transl Sci* 137, 1-40. doi:  
754 10.1016/bs.pmbts.2015.10.017.
- 755 Szklarczyk, D., Santos, A., von Mering, C., Jensen, L.J., Bork, P., and Kuhn, M. (2016). STITCH 5:  
756 augmenting protein-chemical interaction networks with tissue and affinity data. *Nucleic Acids*  
757 *Res* 44(D1), D380-384. doi: 10.1093/nar/gkv1277.

- 758 Taylor, S.B., Lewis, C.R., and Olive, M.F. (2013). The neurocircuitry of illicit psychostimulant  
759 addiction: acute and chronic effects in humans. *Subst Abuse Rehabil* 4, 29.
- 760 Tomkins, D.M., and Sellers, E.M. (2001). Addiction and the brain: the role of neurotransmitters in  
761 the cause and treatment of drug dependence. *CMAJ* 164(6), 817-821.
- 762 Tritsch, N.X., Ding, J.B., and Sabatini, B.L. (2012). Dopaminergic neurons inhibit striatal output  
763 through non-canonical release of GABA. *Nature* 490(7419), 262.
- 764 Uhlén, M., Fagerberg, L., Hallström, B.M., Lindskog, C., Oksvold, P., Mardinoglu, A., et al. (2015).  
765 Tissue-based map of the human proteome. *Science* 347(6220), 1260419.
- 766 Volkow, N., and Morales, M. (2015). The brain on drugs: from reward to addiction. *Cell* 162(4), 712-  
767 725.
- 768 Volkow, N.D., Fowler, J.S., and Wang, G.-J. (2003). The addicted human brain: insights from  
769 imaging studies. *J Transl Med* 111(10), 1444-1451.
- 770 Volkow, N.D., Koob, G.F., and McLellan, A.T. (2016). Neurobiologic Advances from the Brain  
771 Disease Model of Addiction. *N Engl J Med* 374(4), 363-371. doi: 10.1056/NEJMra1511480.
- 772 Volkow, N.D., Wang, G.-J., Fischman, M., Foltin, R., Fowler, J., Abumrad, N., et al. (1997).  
773 Relationship between subjective effects of cocaine and dopamine transporter occupancy.  
774 *Nature* 386(6627), 827.
- 775 Williams, M.J., and Adinoff, B. (2008). The role of acetylcholine in cocaine addiction.  
776 *Neuropsychopharmacology* 33(8), 1779.
- 777 Wise, R.A. (1996). Addictive drugs and brain stimulation reward. *Annu Rev Neurosci* 19, 319-340.  
778 doi: 10.1146/annurev.ne.19.030196.001535.
- 779 Wise, R.A., and Koob, G.F. (2014). The development and maintenance of drug addiction.  
780 *Neuropsychopharmacology* 39(2), 254-262. doi: 10.1038/npp.2013.261.
- 781 Wishart, D.S., Feunang, Y.D., Guo, A.C., Lo, E.J., Marcu, A., Grant, J.R., et al. (2018). DrugBank  
782 5.0: a major update to the DrugBank database for 2018. *Nucleic Acids Res* 46(D1), D1074-  
783 D1082. doi: 10.1093/nar/gkx1037.
- 784 Wood, J.D., and Galligan, J. (2004). Function of opioids in the enteric nervous system.  
785 *Neurogastroenterol Motil* 16, 17-28.
- 786 Xie, X.-Q., Wang, L., Wang, J., Xie, Z., Yang, P., and Ouyang, Q. (2016). "In Silico  
787 Chemogenomics Knowledgebase and Computational System Neuropharmacology Approach  
788 for Cannabinoid Drug Research," in *Neuropathology of Drug Addictions and Substance*  
789 *Misuse*. Elsevier, 183-195.
- 790 Xie, X.Q., Wang, L., Liu, H., Ouyang, Q., Fang, C., and Su, W. (2014). Chemogenomics  
791 knowledgebased polypharmacology analyses of drug abuse related G-protein coupled  
792 receptors and their ligands. *Front Pharmacol* 5, 3. doi: 10.3389/fphar.2014.00003.
- 793 Yao, J., Ma, C., Gao, W., Liang, J., Liu, C., Yang, H., et al. (2016). Fentanyl induces autophagy via  
794 activation of the ROS/MAPK pathway and reduces the sensitivity of cisplatin in lung cancer  
795 cells. *Oncol Rep* 36(6), 3363-3370. doi: 10.3892/or.2016.5183.
- 796 Yousefi, O.S., Wilhelm, T., Maschke-Neuß, K., Kuhny, M., Martin, C., Molderings, G.J., et al.  
797 (2013). The 1, 4-benzodiazepine Ro5-4864 (4-chlorodiazepam) suppresses multiple pro-  
798 inflammatory mast cell effector functions. *Cell Commun Signal* 11(1), 13.

- 799 Zhu, J., Spencer, T.J., Liu-Chen, L.-Y., Biederman, J., and Bhide, P.G. (2011). Methylphenidate and  
800  $\mu$  opioid receptor interactions: a pharmacological target for prevention of stimulant abuse.  
801 *Neuropharmacology* 61(1-2), 283-292.
- 802 Zhu, M., Xu, Y., Wang, H., Shen, Z., Xie, Z., Chen, F., et al. (2018). Heroin Abuse Results in Shifted  
803 RNA Expression to Neurodegenerative Diseases and Attenuation of TNF $\alpha$  Signaling  
804 Pathway. *Sci Rep* 8(1), 9231. doi: 10.1038/s41598-018-27419-9.

805

## 806 10 Figure legends

807 **Figure 1. Distribution of the dataset of 50 drugs of abuse based on their structure and**  
808 **interaction (with targets) similarities (A-D), and pairwise similarities and classification of the**  
809 **corresponding targets based on their interaction patterns with the drugs of abuse. (A-D)** Drug-  
810 drug distance maps for the studied 50 addictive drugs based on (A) 2D structure fingerprints and (B)  
811 interaction patterns with targets using the correlation cosines between their target vectors (see  
812 *Materials and Methods*), and corresponding dendrograms (C-D). The indices of drugs of abuse in (A)  
813 and (B) follow the same order as those used in **Supplementary Table 1**. The drug labels in C and D  
814 are color-coded based on their categories: CNS stimulants (*green*), CNS depressants (*blue*), opioids  
815 (*cyan*), cannabinoids (*light brown*), anabolic steroids (*black*) and hallucinogens (*magenta*). Note that  
816 the drugs of abuse in the same category do not necessarily show structural similarities nor similar  
817 interaction pattern with targets. (E) Pairwise distance map for the 142 known targets based on their  
818 interaction patterns with the 50 drugs. The indices in (E) follows the same order as those listed  
819 clockwise in the dendrogram (F). The tree maps in (C), (D) and (F) are generated based on the  
820 respective distances values in the (A), (B) and (E).

821 **Figure 2. Promiscuity of drugs of abuse and their targets, and major families of proteins**  
822 **targeted by drugs of abuse.** Number of known (*gray*) and predicted (*white*) interactions are shown  
823 by bars for (A) drugs of abuse and (B) their targets. The examined set consists of 50 drugs of abuse  
824 and a total of 142 known and 48 predicted targets, involved in 445 (known) and 161 (predicted)  
825 interactions. Panel A displays the number of interactions known or predicted for all 50 drugs. Panel B  
826 displays the results for the targets that interact with at least 4 known drugs (36 targets). The colors  
827 used for names of drugs and targets are same as those used in **Figure 1**. Panel C displays the  
828 distribution of families of proteins targeted by drugs of abuse.

829 **Figure 3. Results from pathway and target enrichments analysis.** Five broad categories of  
830 pathways are distinguished among those involving the targets of drug abuse: NT, synaptic  
831 neurotransmission pathways; SG, signal transduction pathways; DS, disease-associated pathways;  
832 ANS, autonomic nervous system-innervation pathways; and NP, neuroplasticity related pathways.  
833 (A) Numbers of pathways (*red bars*) and targets (*gray bars*) of drug abuse lying in the five  
834 categories, based on data available in DrugBank and STITCH. The *pink* and *white* stacked bars are  
835 the corresponding numbers for pathways and targets additionally predicted by PMF. (B) Overlaps  
836 between the target content of the five pathway categories. See the complete list of pathways and  
837 targets in **Supplementary Table 4**.

838 **Figure 4. The impact of drugs of abuse on synaptic neurotransmission.** Five major  
839 neurotransmission events are highlighted, mediated by (*counterclockwise, starting from top*): GABA  
840 receptors and transporters, ionotropic glutamate receptors (NMDAR and AMPAR) and cation  
841 channels, serotonin (5HT) receptors (5-HTR) and transporters (SERT), muscarinic or nicotinic

842 AChRs, and dopamine (DA) receptors and transporters. Vesicular monoamine transporters (VMAT)  
843 that translocate DA are also shown. Drugs affecting the different pathways are listed, color coded  
844 with their categories, as presented in **Figure 1**. *Solid red arrows* indicate a known drug-target  
845 interaction, *dashed red arrows* indicate predicted drug-target interactions. Other molecules shown in  
846 the diagram are: KA, kainate receptor; MAO, monoamine oxidase; HVA, homovanillate; 3-MT, 3-  
847 methoxytyramine; MOR, mu-type opioid receptor; AChE, acetylcholinesterase; and 5-H1AA, 5-  
848 hydroxyindoleacetate.

849 **Figure 5. A unified signaling network mediates the effects of drugs of abuse.** *Black arrows*  
850 represent the activation, inhibition, and translocation events during signal transduction. *Solid gray*  
851 *arrows* represent the known drug-target interactions. *Dashed gray arrows* represent predicted drug-  
852 target interactions. The diagram illustrates the targets of several drugs of abuse belong to different  
853 categories: loperamide and fentanyl belong to the opioids group; midomafetamine and ketamine are  
854 from the hallucinogens group; triazolam and diazepam are CNS depressants; cannabichromene is a  
855 cannabinoid; methamphetamine and cocaine are CNS stimulants; nandrolone is an anabolic steroid.  
856 The mTORC1 emerges as a hub where the effects on several targets of abused drugs appear to be  
857 consolidated to lead to cell death and/or protein synthesis in the CNS, and in particular  
858 AMPAR/PSD95 synthesis that induces morphological changes in the dendrites.

**(A)****(B)****(E)**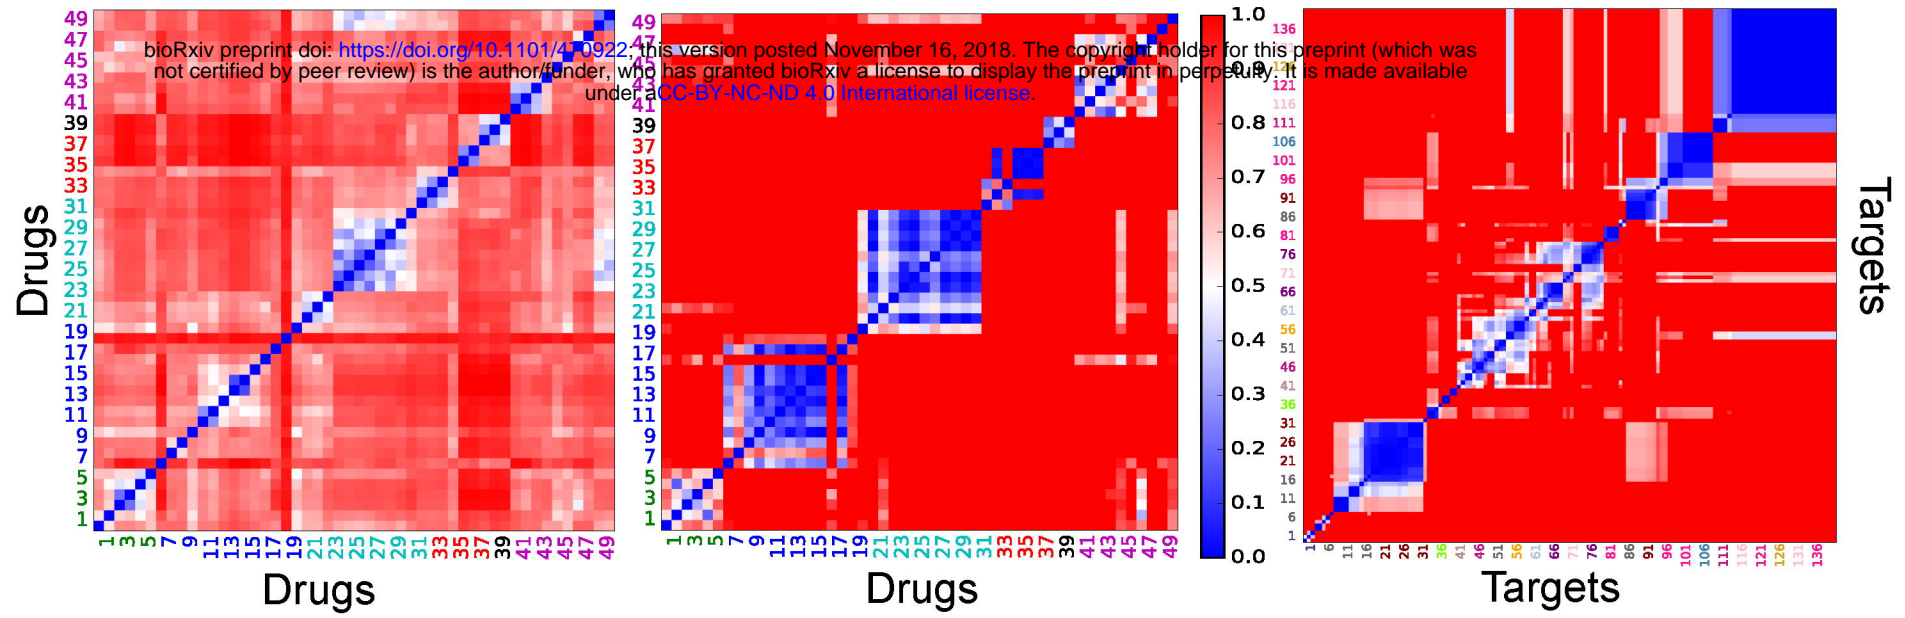**(C)****(D)****(F)**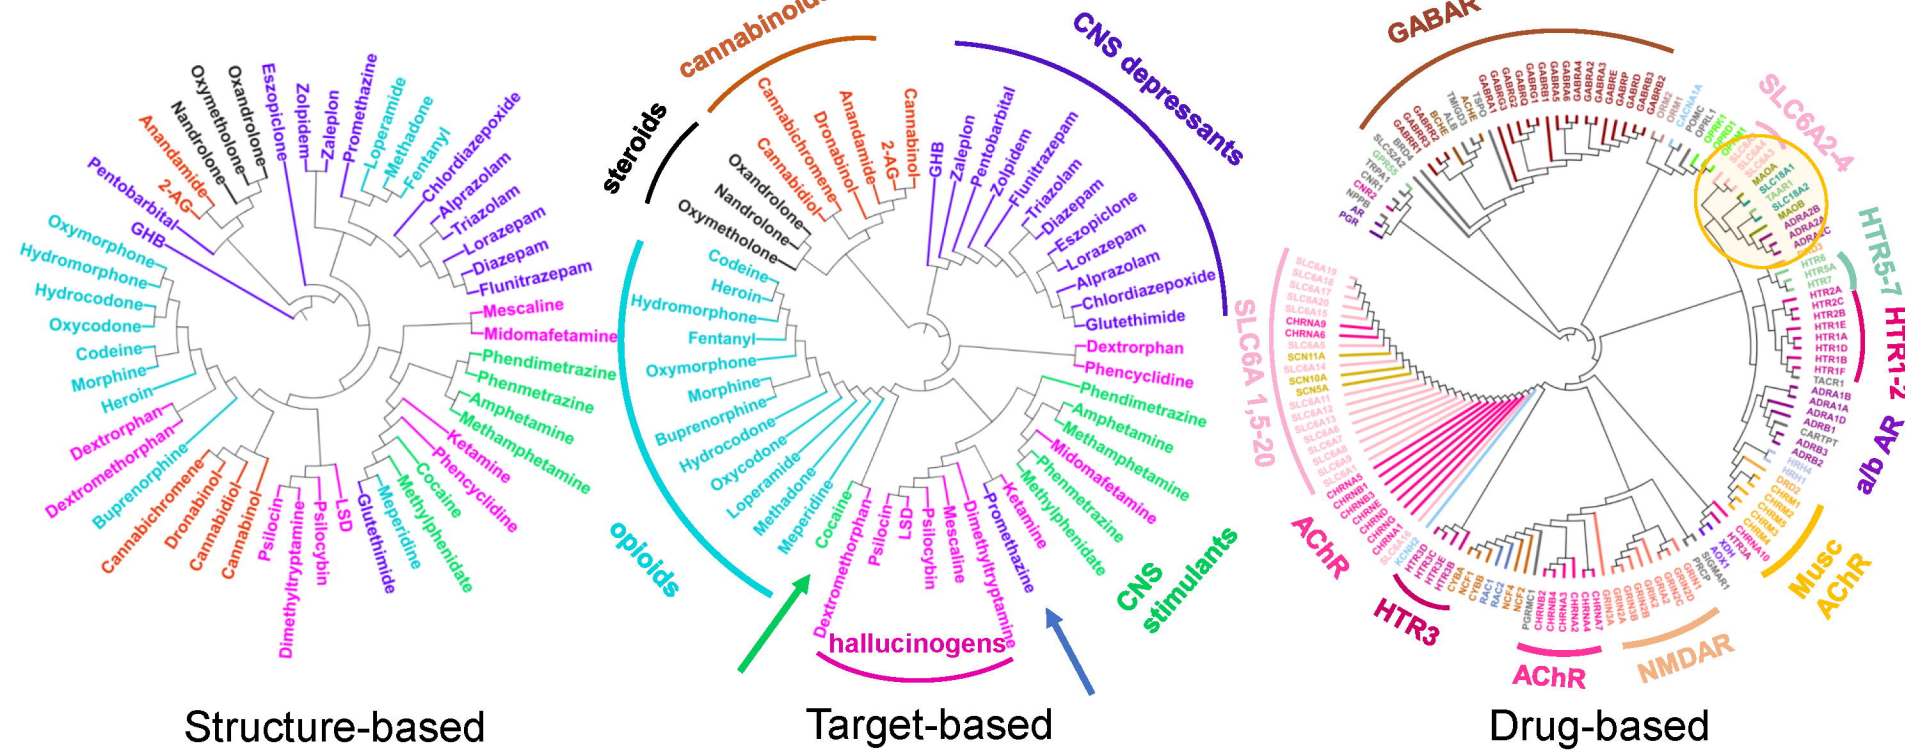**Figure 1**

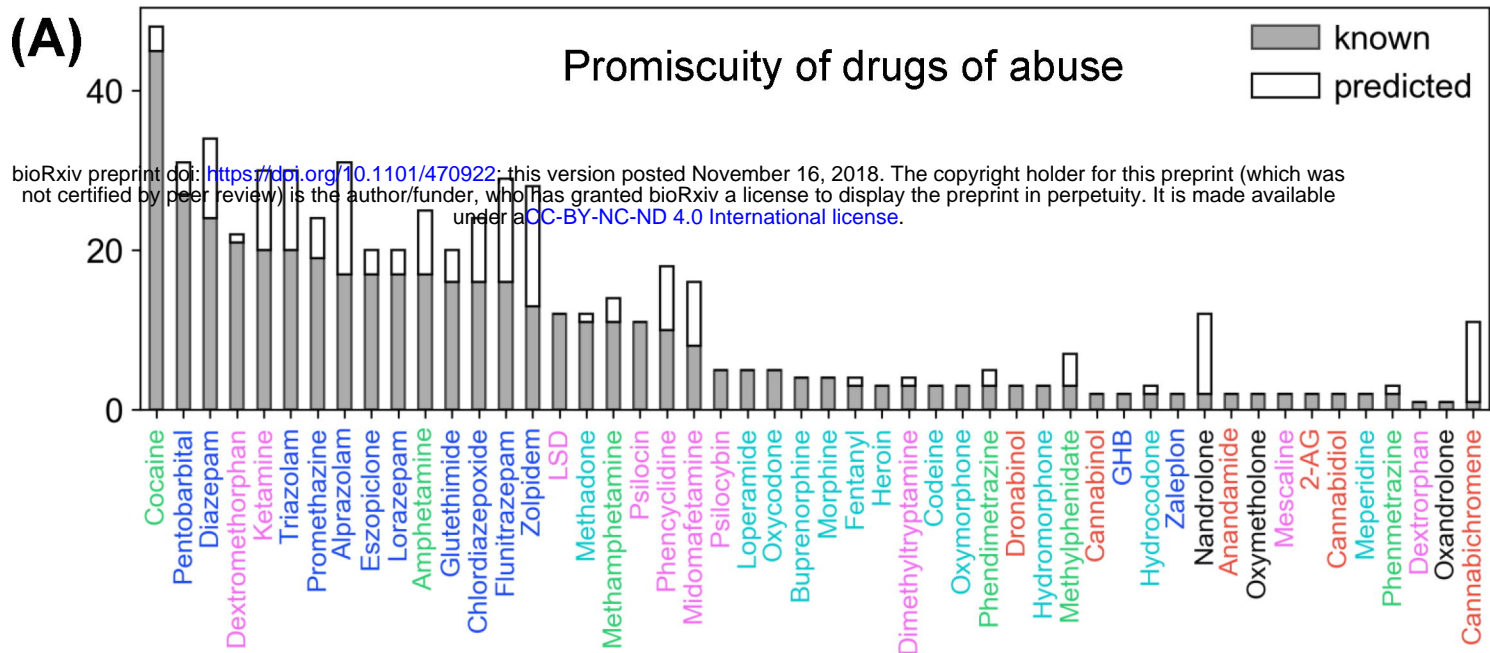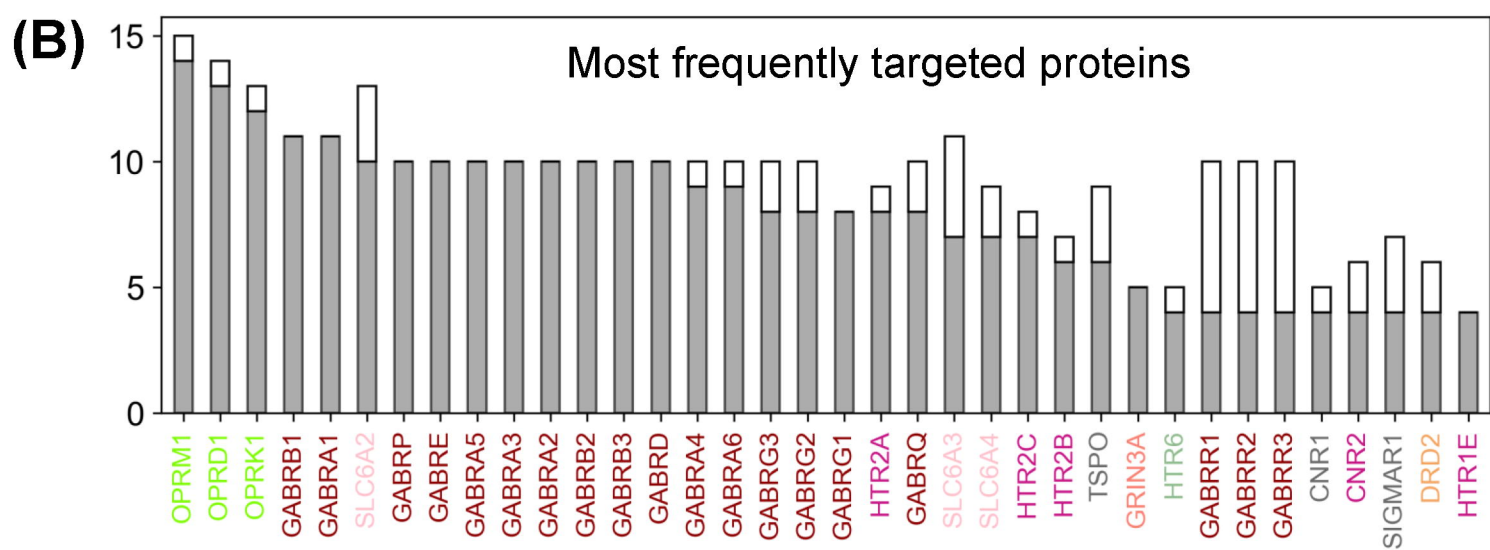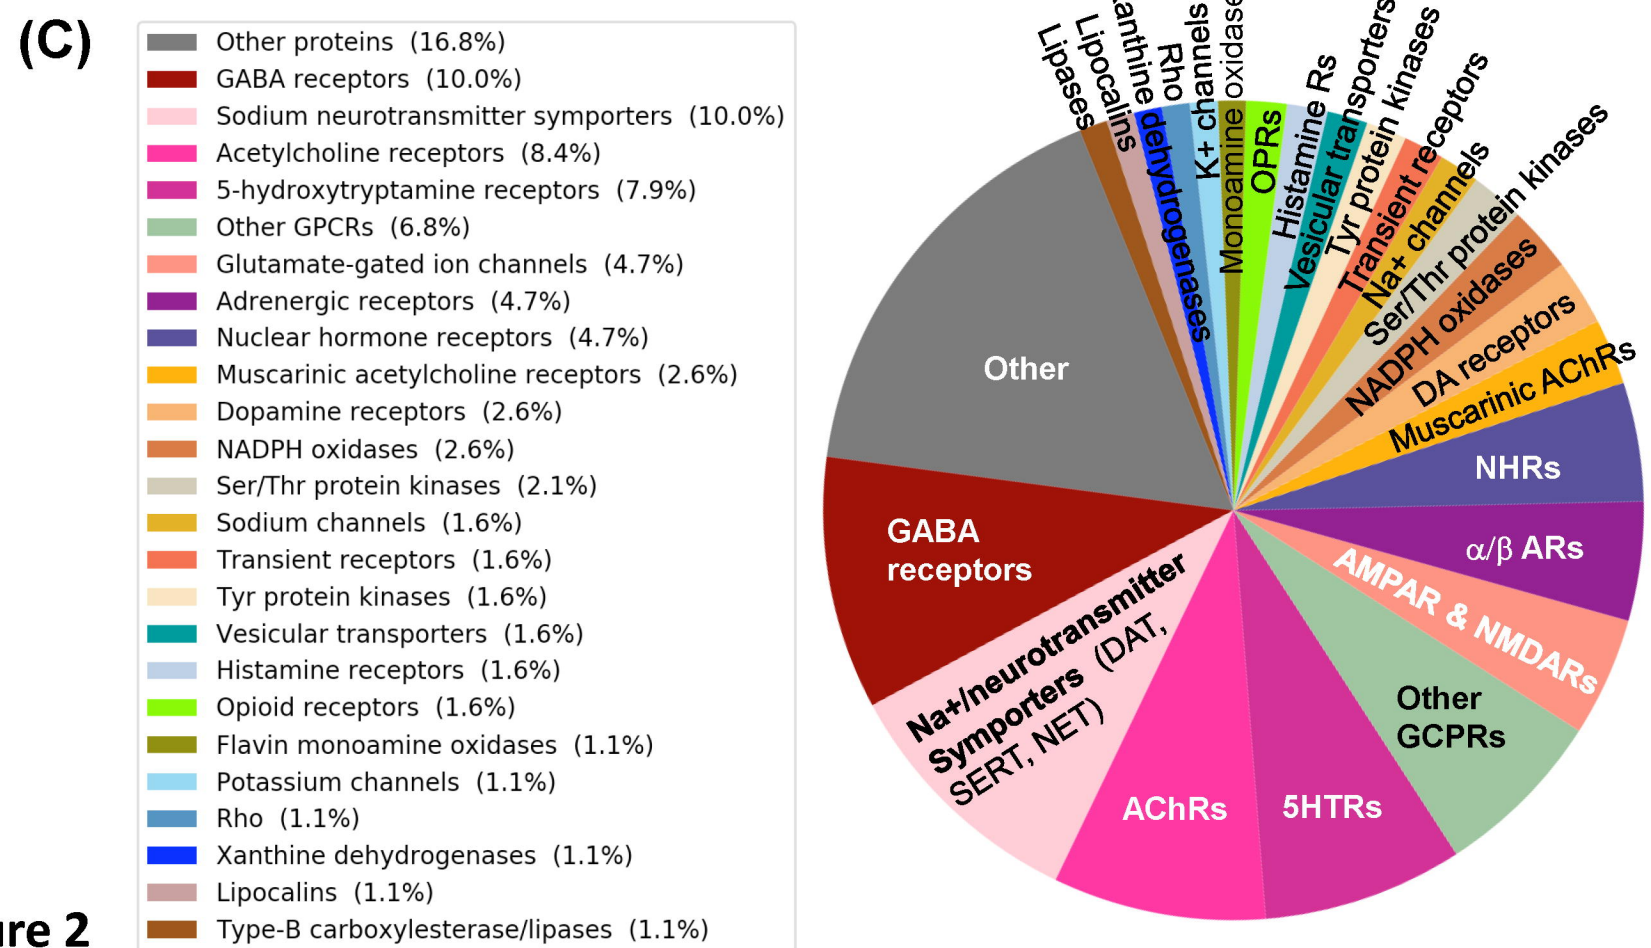

**Figure 2**

(A)

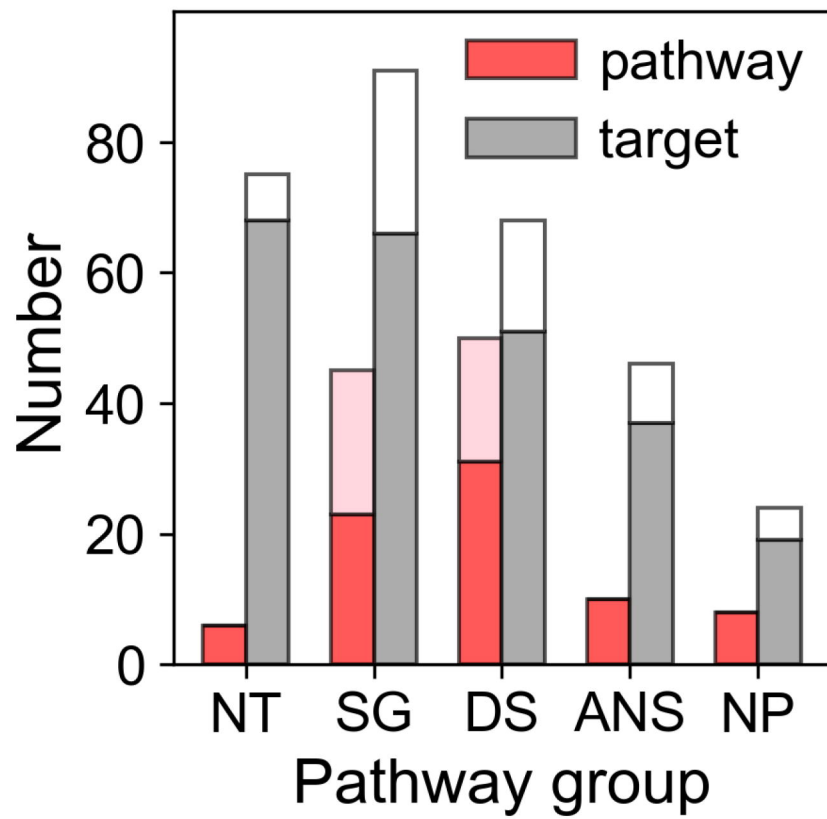

(B)

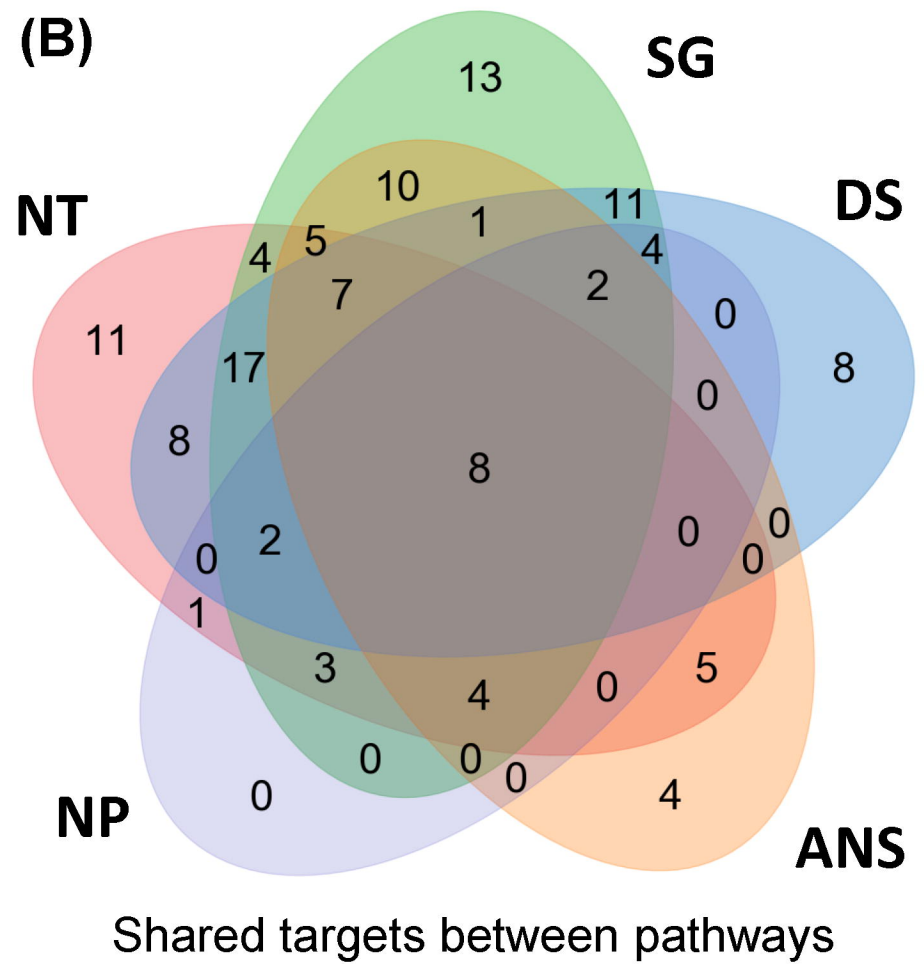

Figure 3



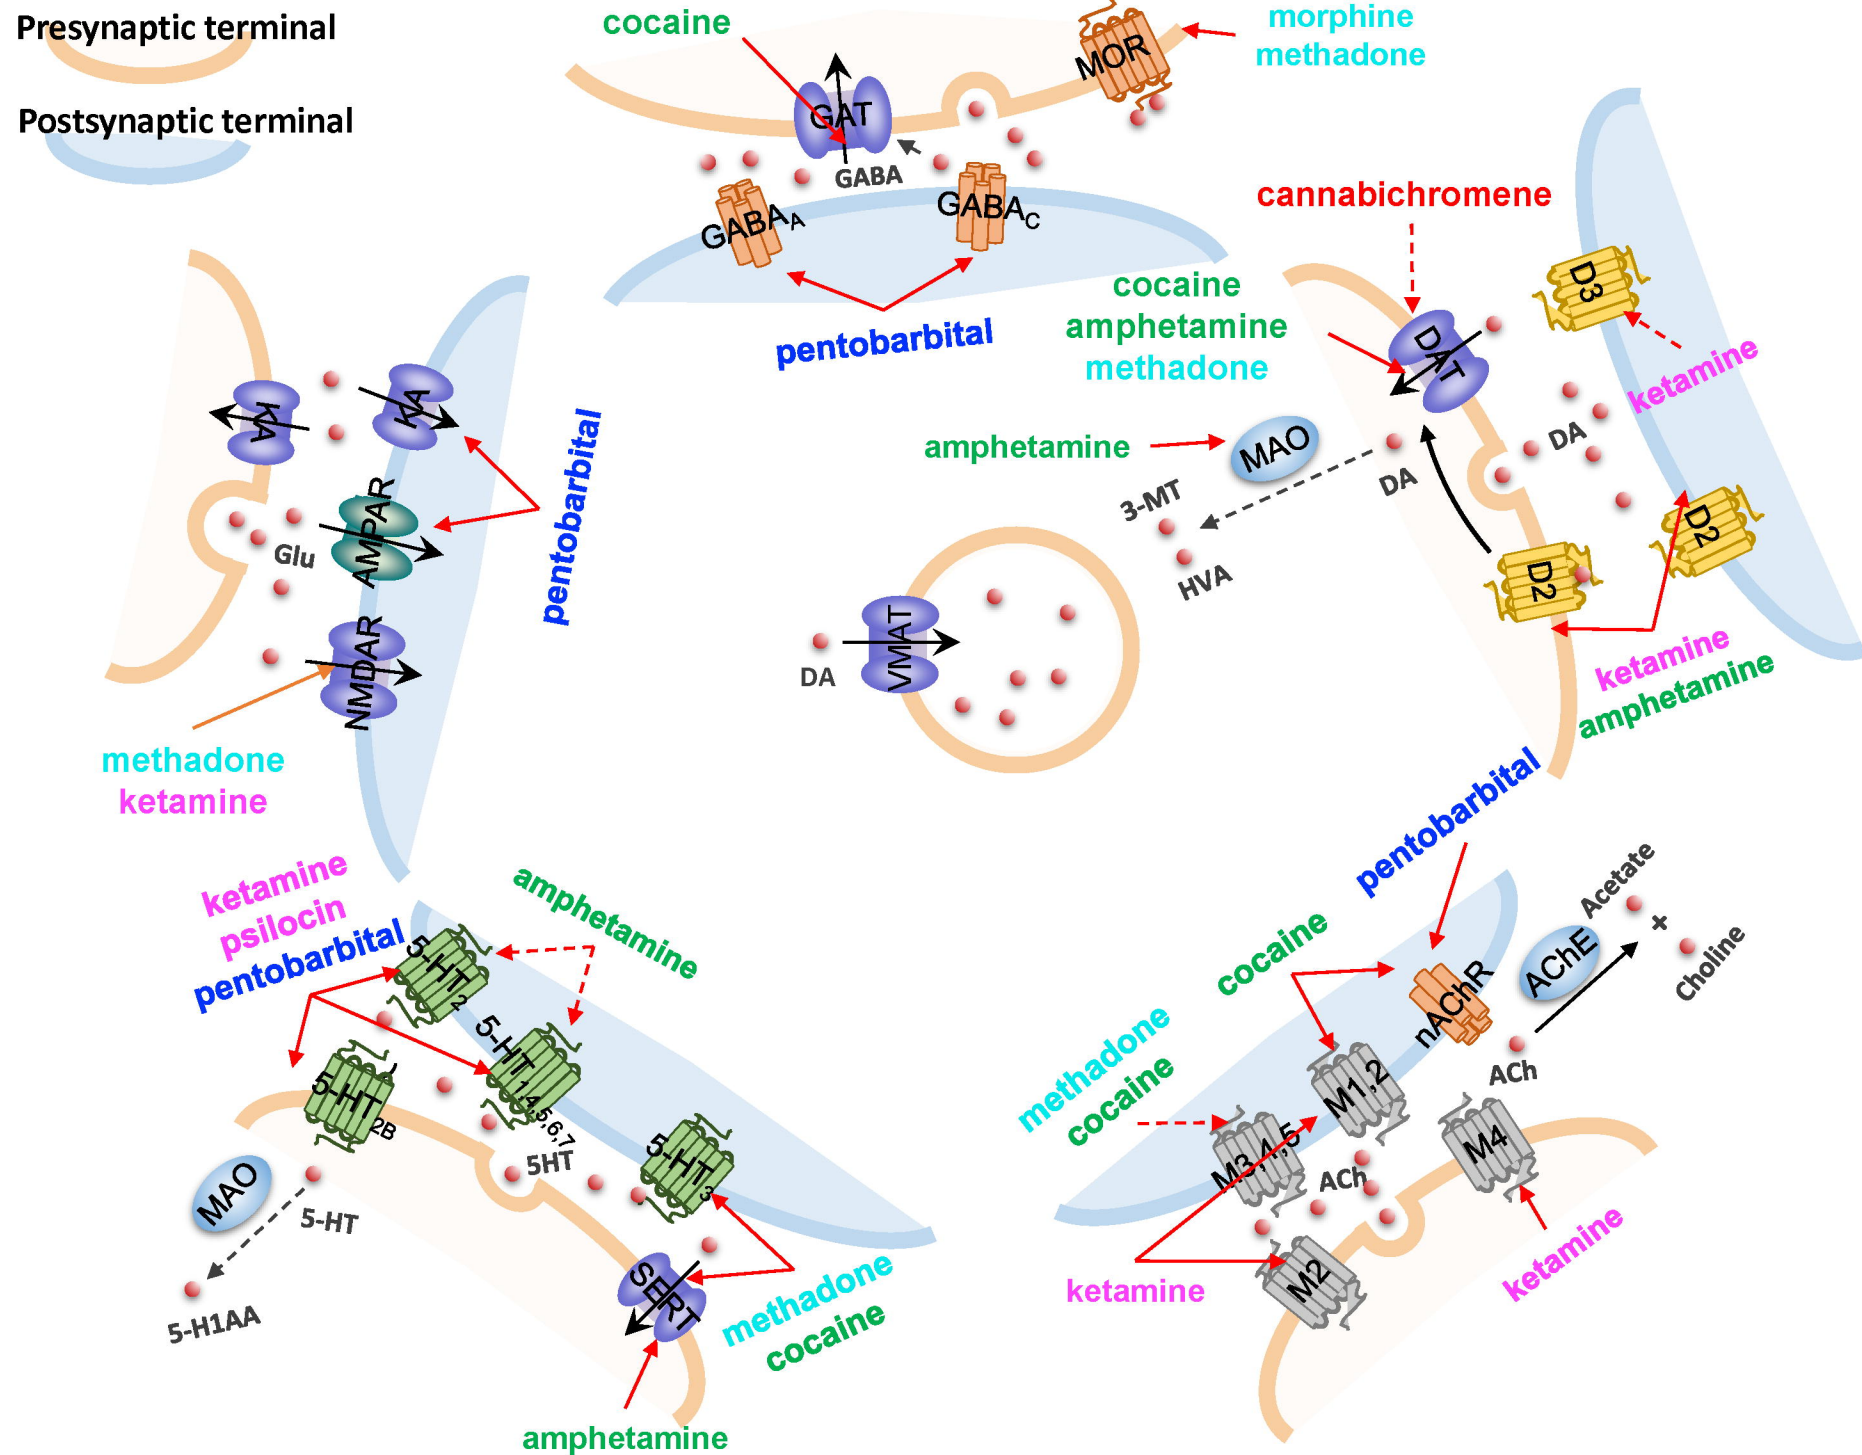

Figure 4

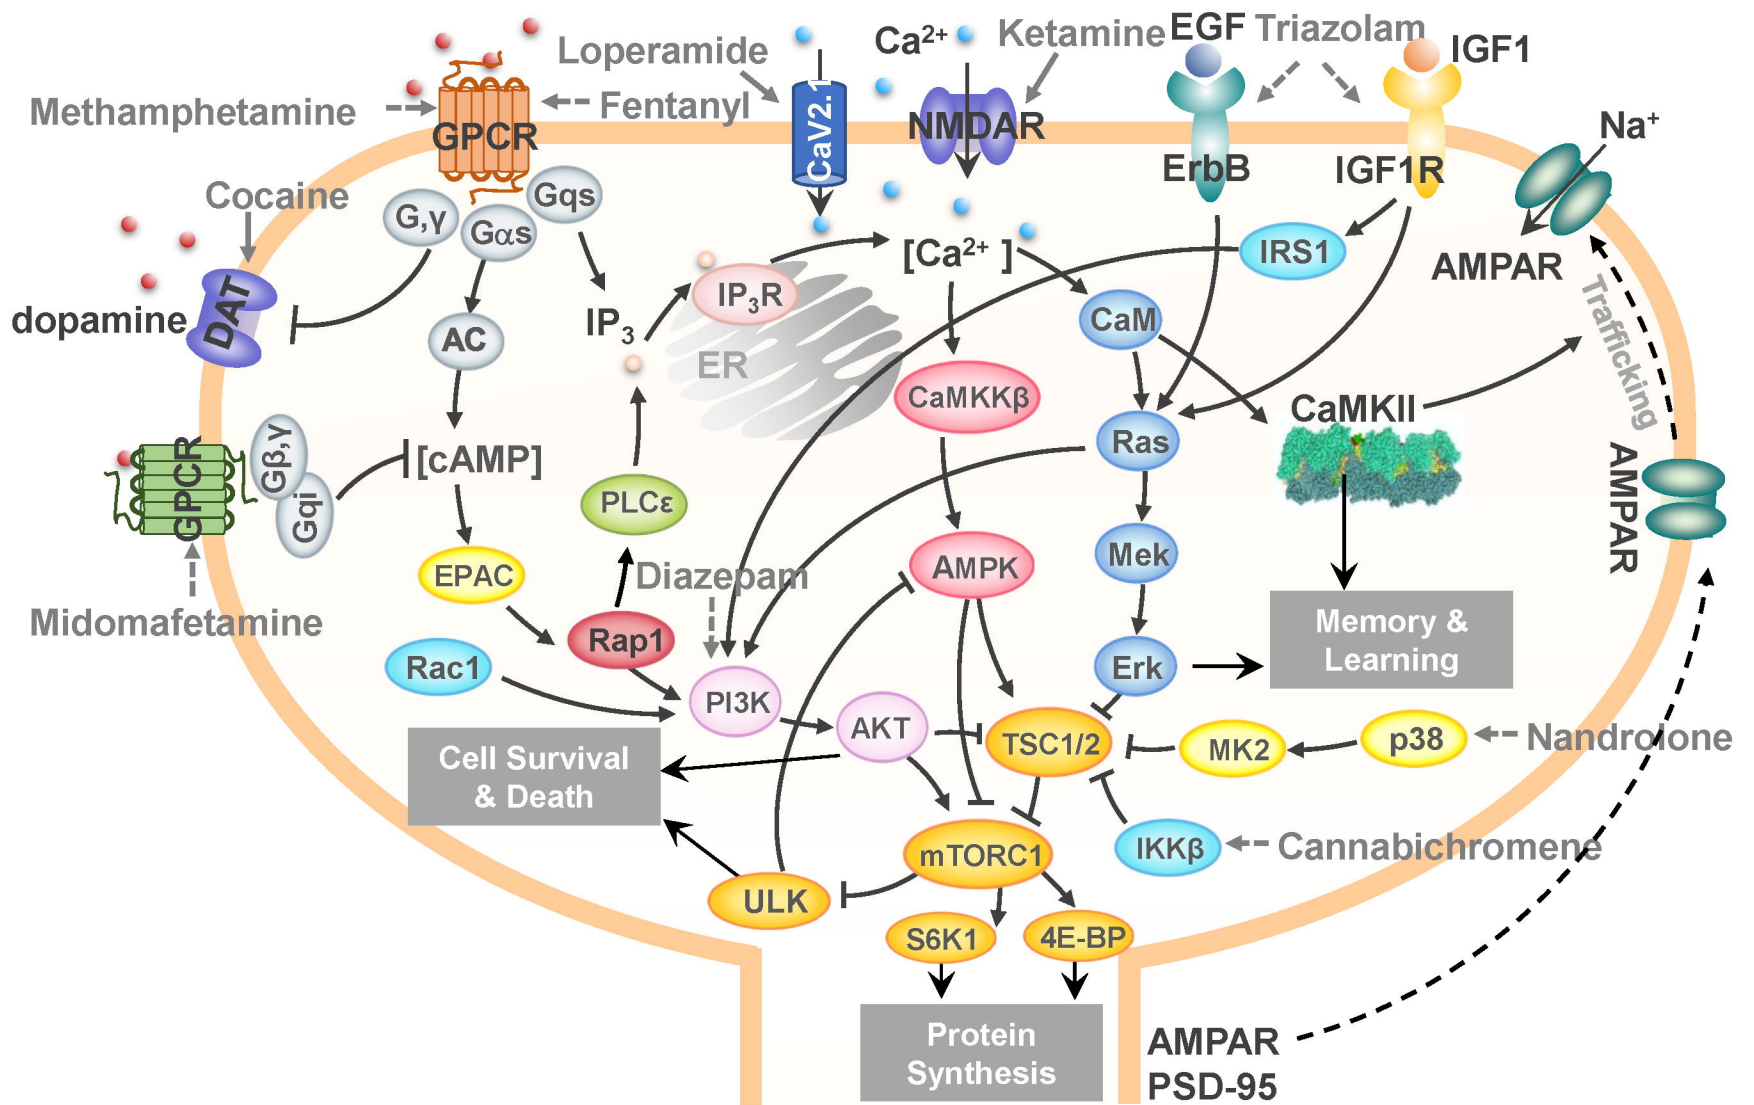

Figure 5
